# Supplementary material for: The Influence of Metabolic Inhibitors, Antibiotics, and Microgravity on Intact Cell MALDI-TOF Mass Spectra of the Cyanobacterium Synechococcus Sp. UPOC S4
Source: MDPI journal article supplement (doi:10.3390/molecules26061683), 2021-03-17

Šebela, M.; Raus, M.; Ondřej, V.; Hašler, P. The influence of metabolic inhibitors, antibiotics and microgravity on intact cell MALDI-TOF mass spectra of the cyanobacterium *Synechococcus* sp. UPOC S4.

### Supplementary figure S1

**Hierarchical trees of *Synechococcus* sp. UPOC S4 cells based on IC MALDI-TOF mass spectra.** Multiple spectra were processed for samples cultivated in the presence of antimycin (A), 3-bromopyruvic acid (B), 2-deoxy-D-glucose (C), 2-fluoroacetic acid (D), malonic acid (E), chloramphenicol (F) and in microgravity (G) using MALDI Biotyper Compass Explorer 4.1 software to generate main spectral projections (MSPs). A library of the MSPs was then used for tree construction.

The hierarchical trees follow on further pages.

Panel A) Similarity of IC MALDI-TOF spectra of *Synechococcus* sp. UPOC S4 after the treatment with antimycin A

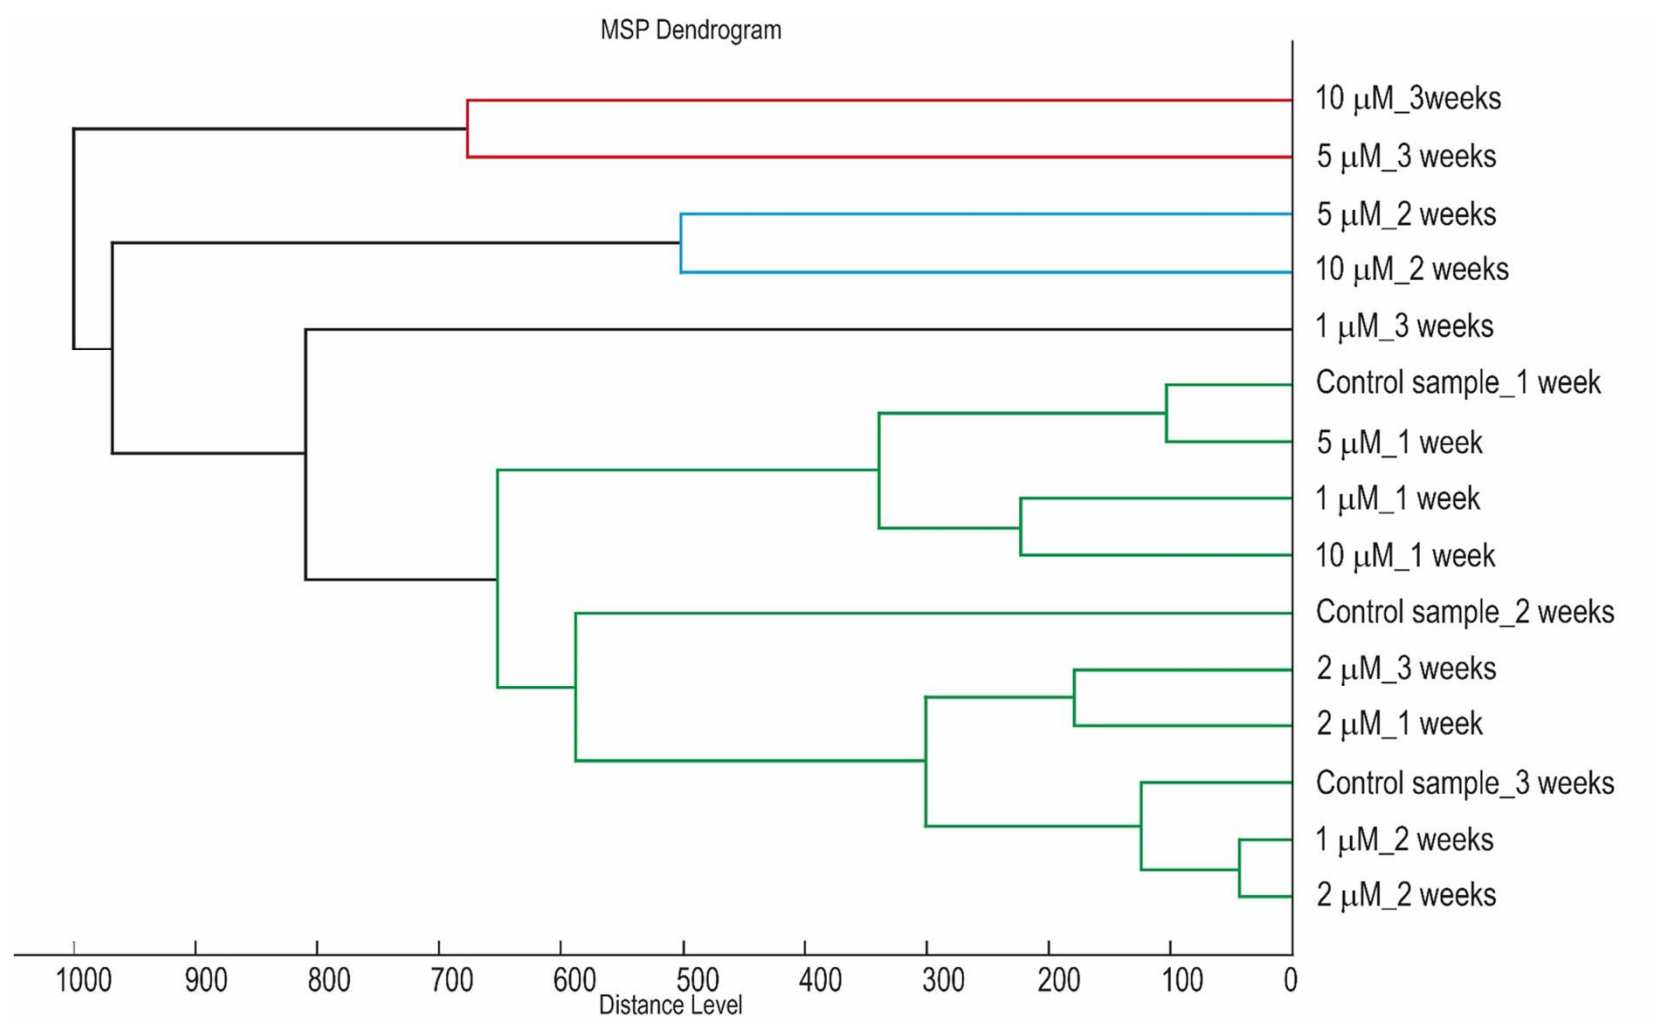

Panel B) Similarity of IC MALDI-TOF spectra of *Synechococcus* sp. UPOC S4 after the treatment with 3-bromopyruvic acid

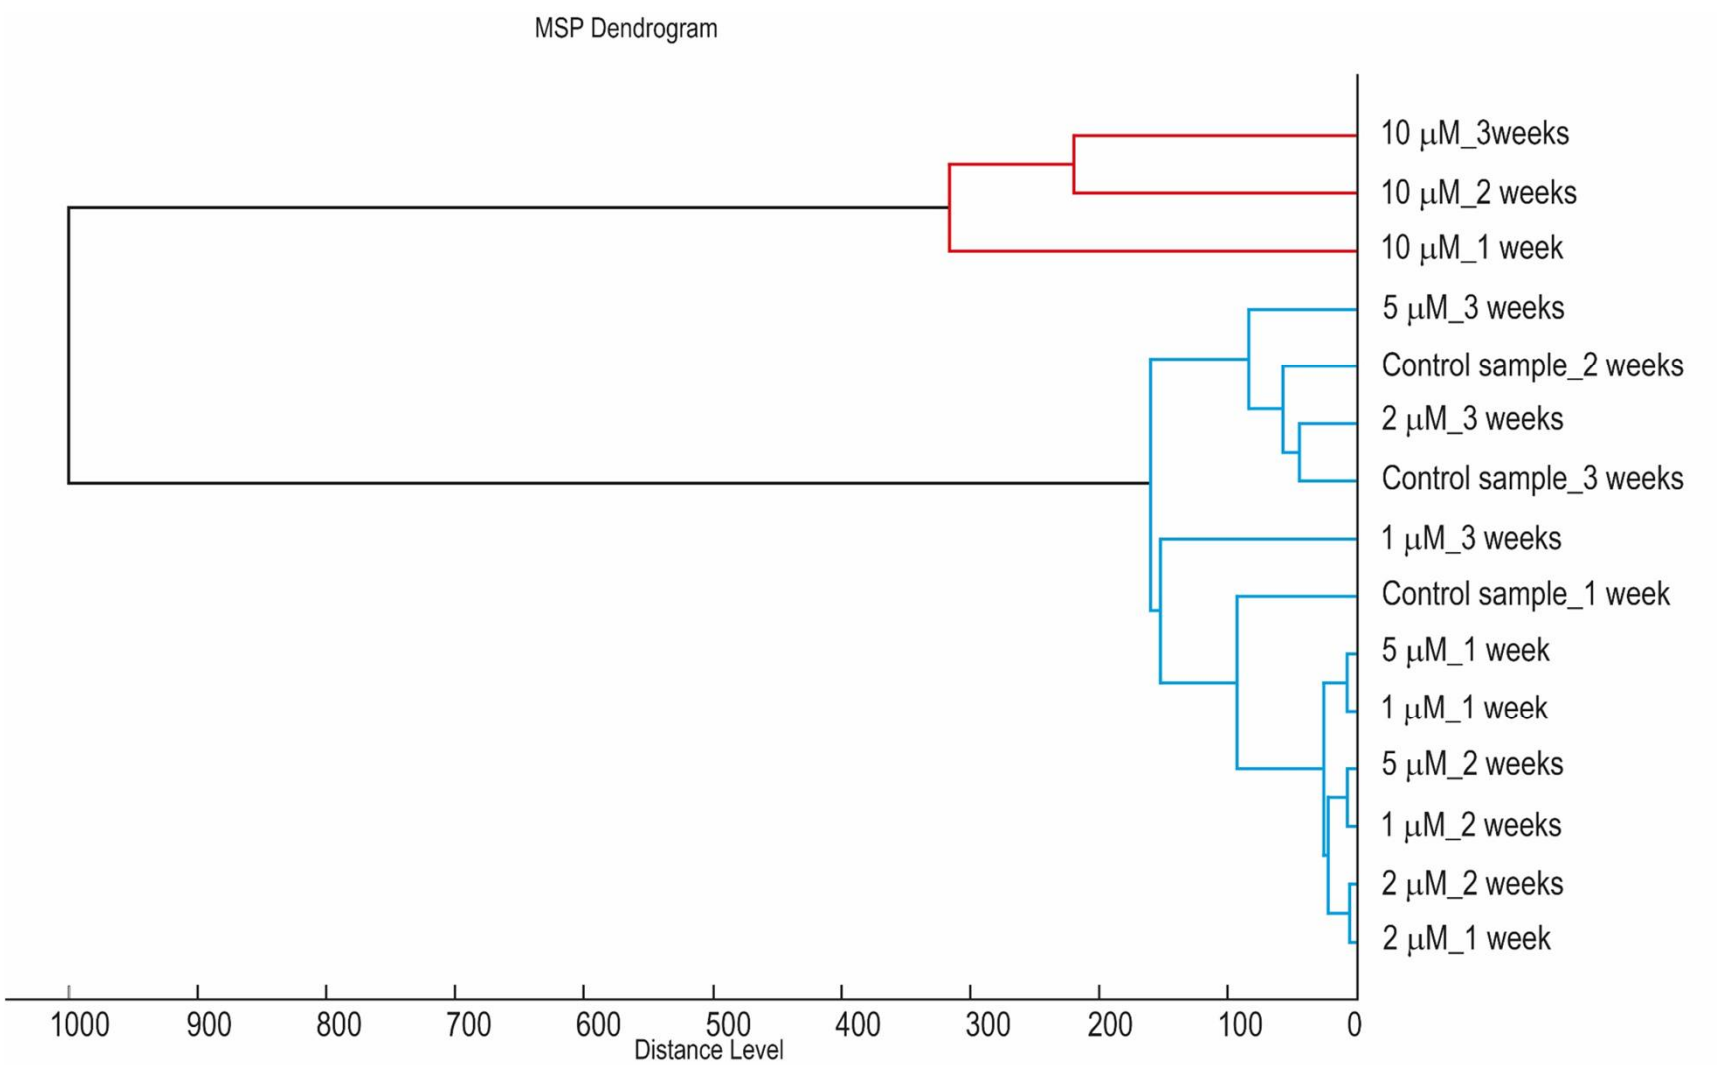

Panel C) Similarity of IC MALDI-TOF spectra of *Synechococcus* sp. UPOC S4 after the treatment with 2-deoxy-D-glucose

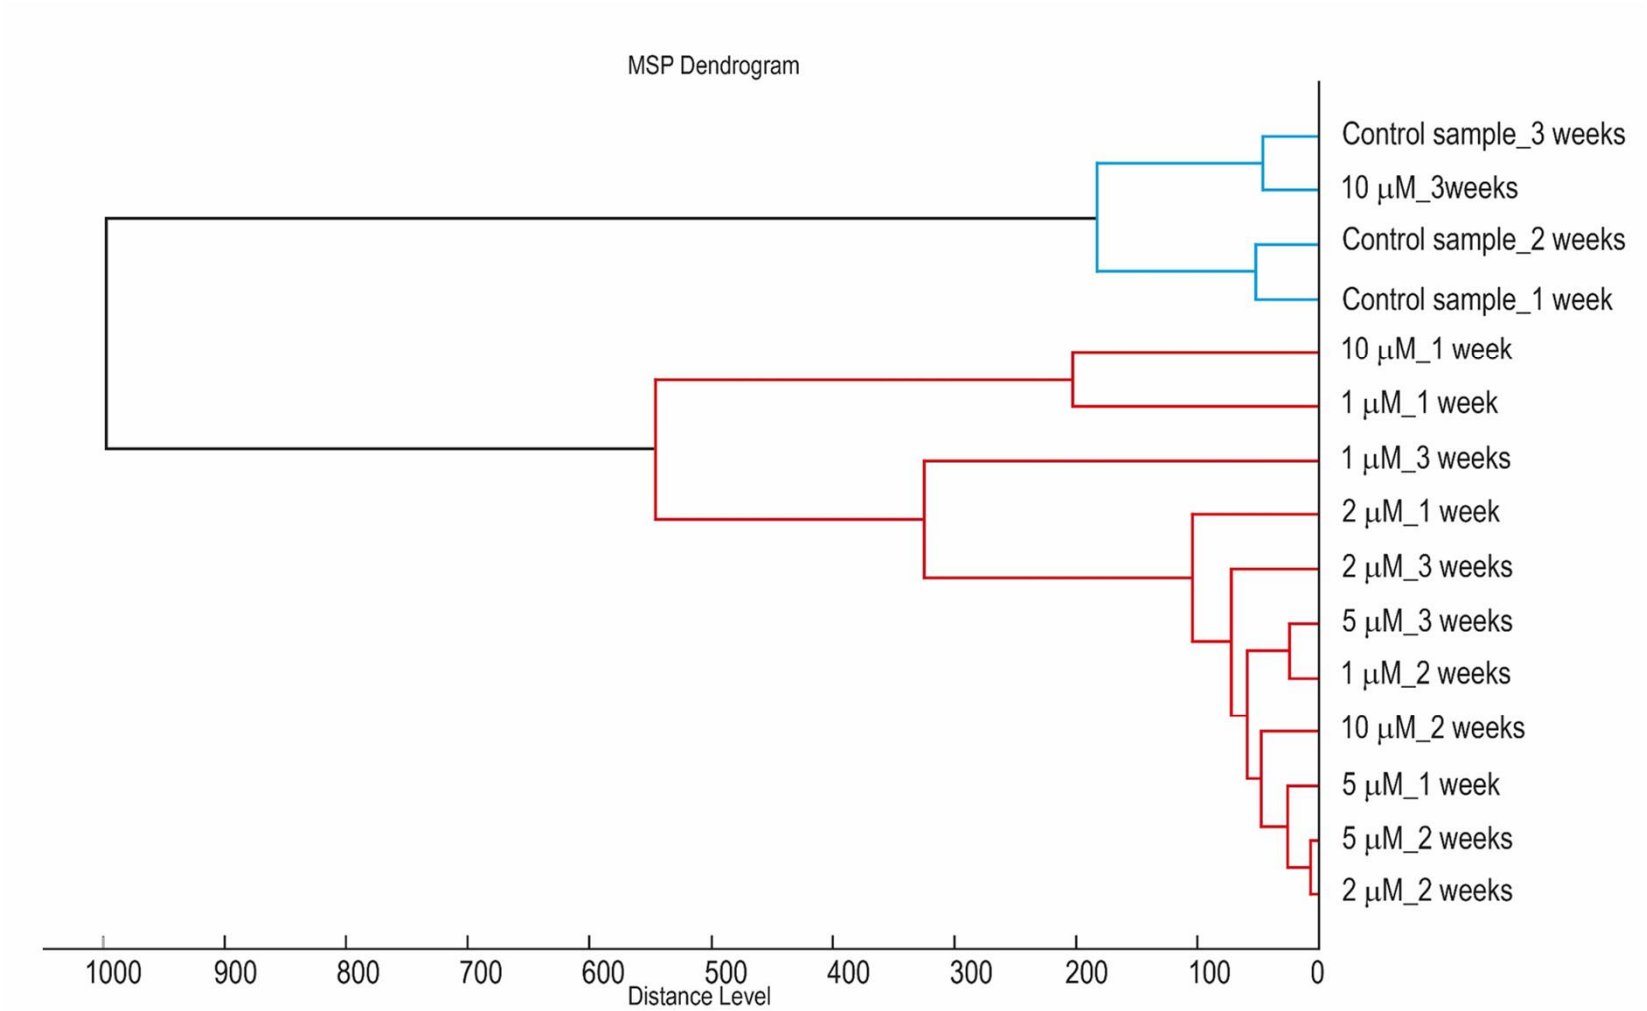

Panel D) Similarity of IC MALDI-TOF spectra of *Synechococcus* sp. UPOC S4 after the treatment with 2-fluoroacetic acid

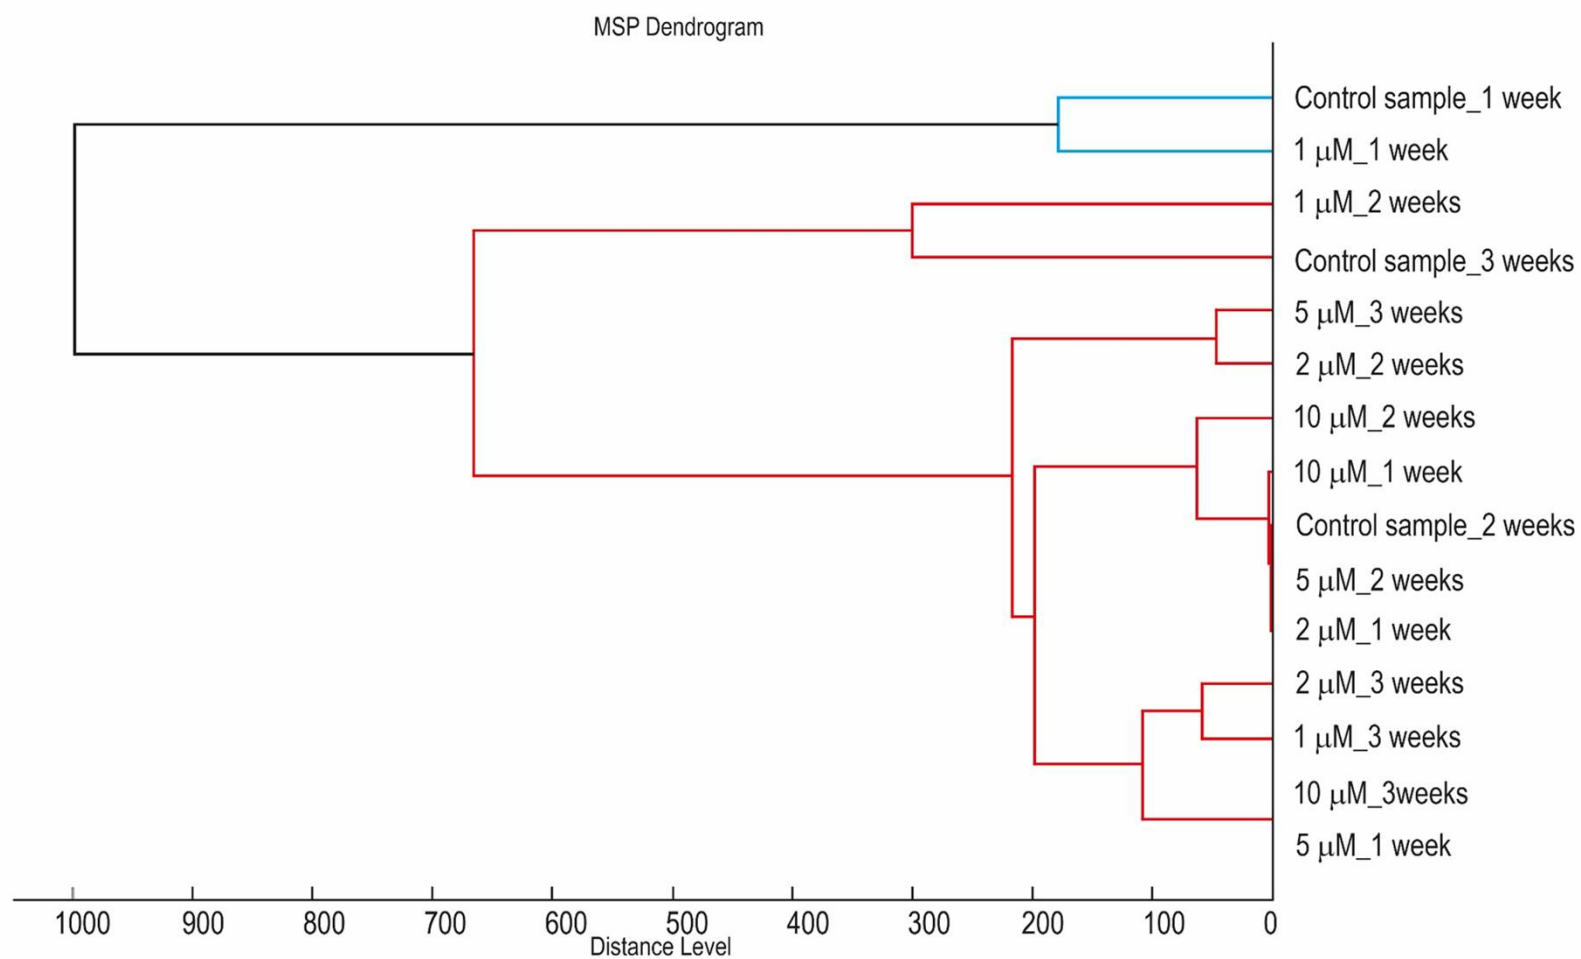

Panel E) Similarity of IC MALDI-TOF spectra of *Synechococcus* sp. UPOC S4 after the treatment with malonic acid

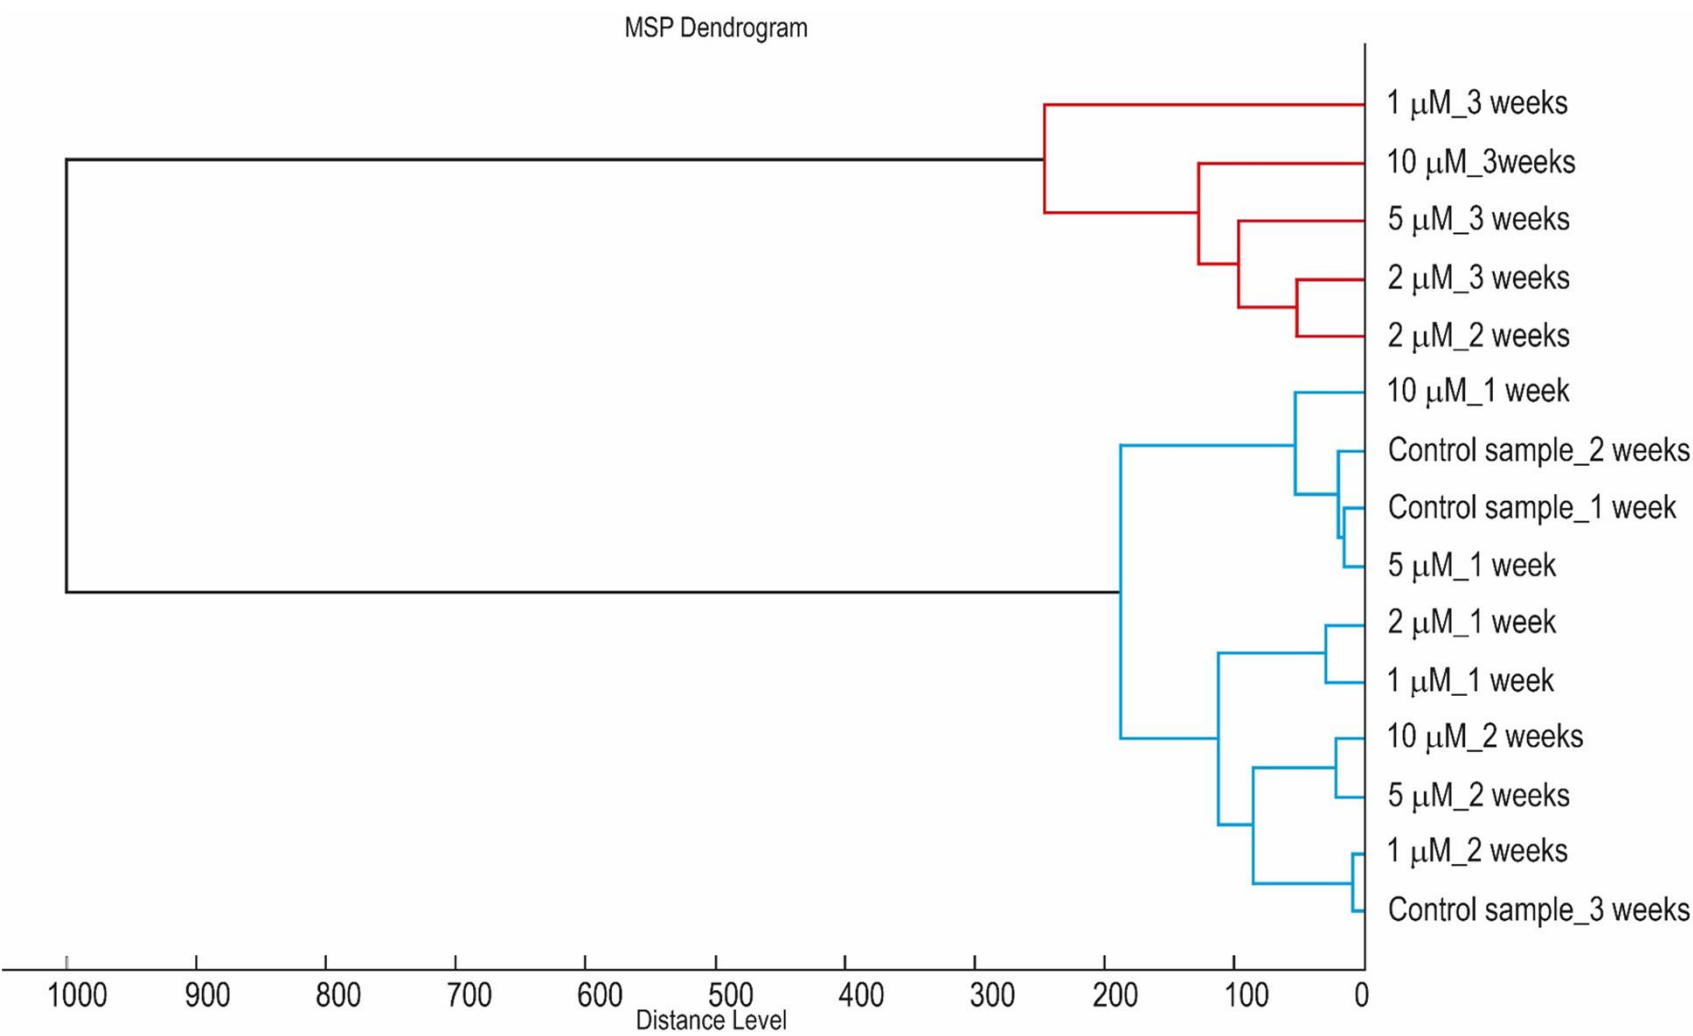

Panel F) Similarity of IC MALDI-TOF spectra of *Synechococcus* sp. UPOC S4 after the treatment with chloramphenicol

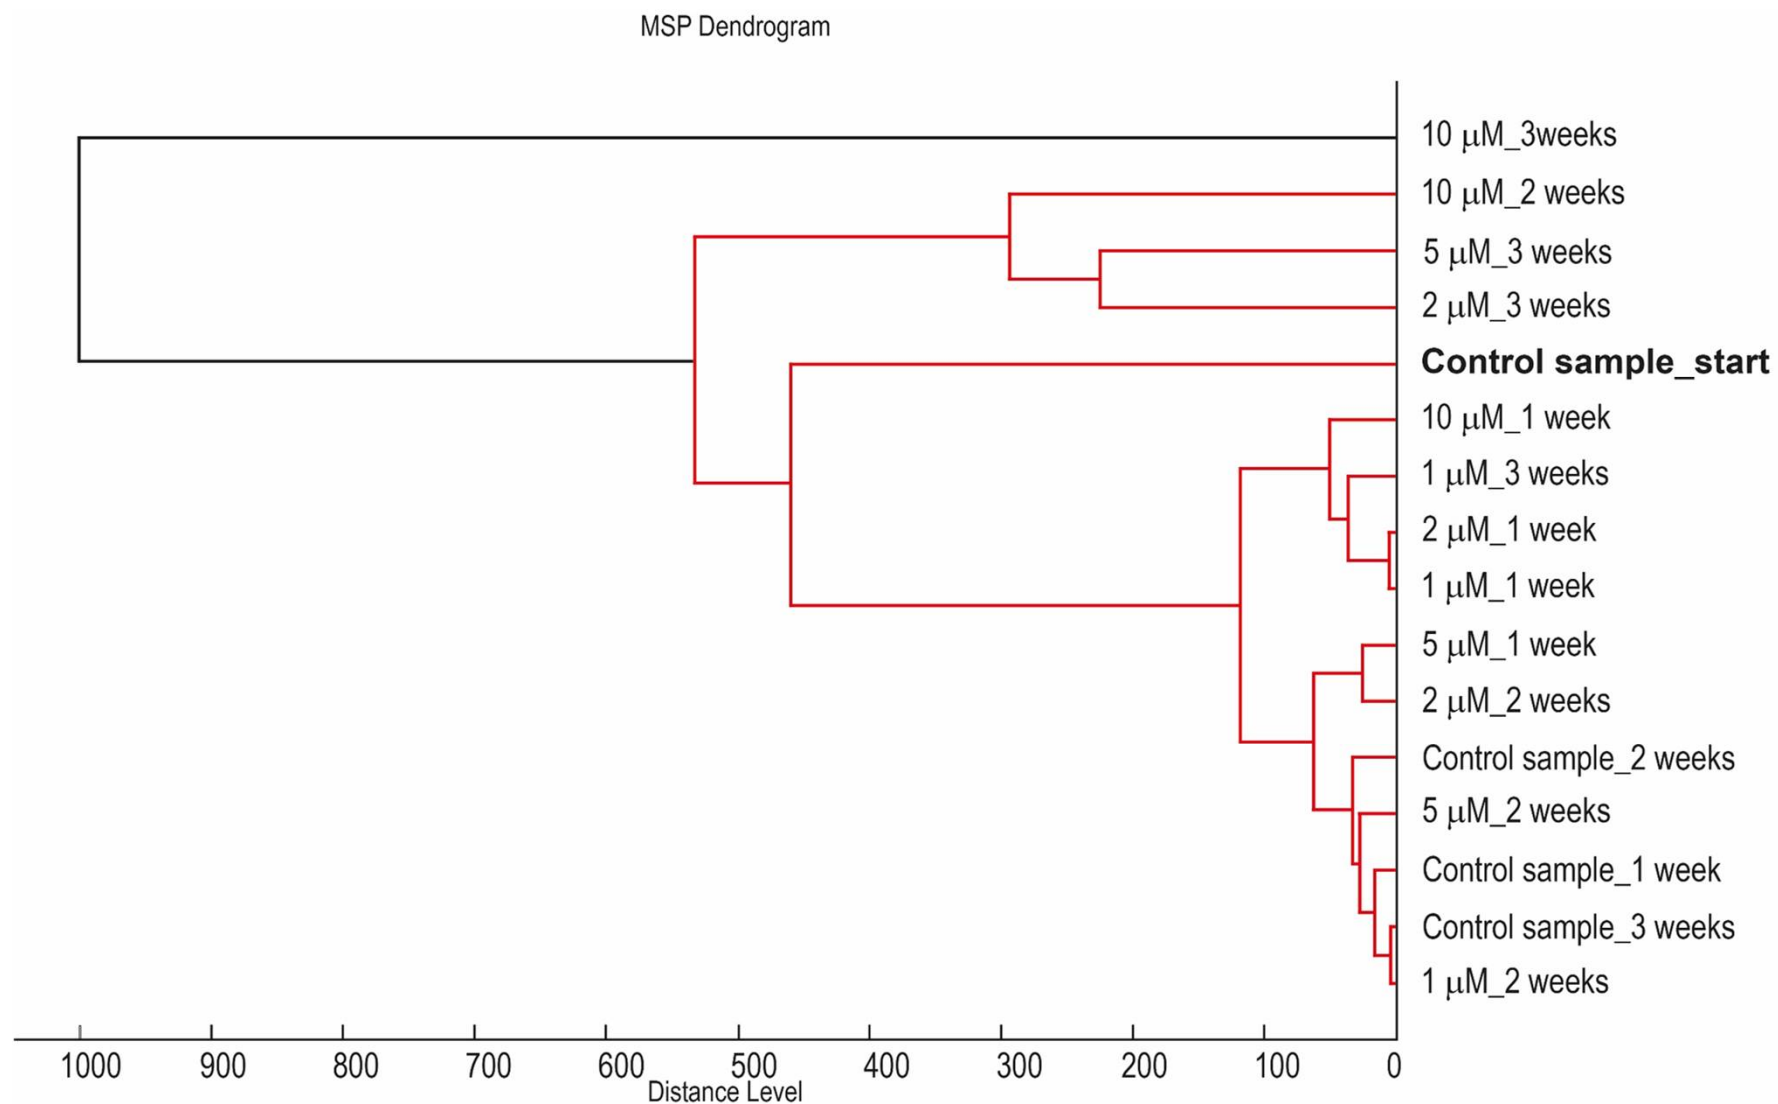

Panel G) Similarity of IC MALDI-TOF spectra of *Synechococcus* sp. UPOC S4 after the growth in microgravity

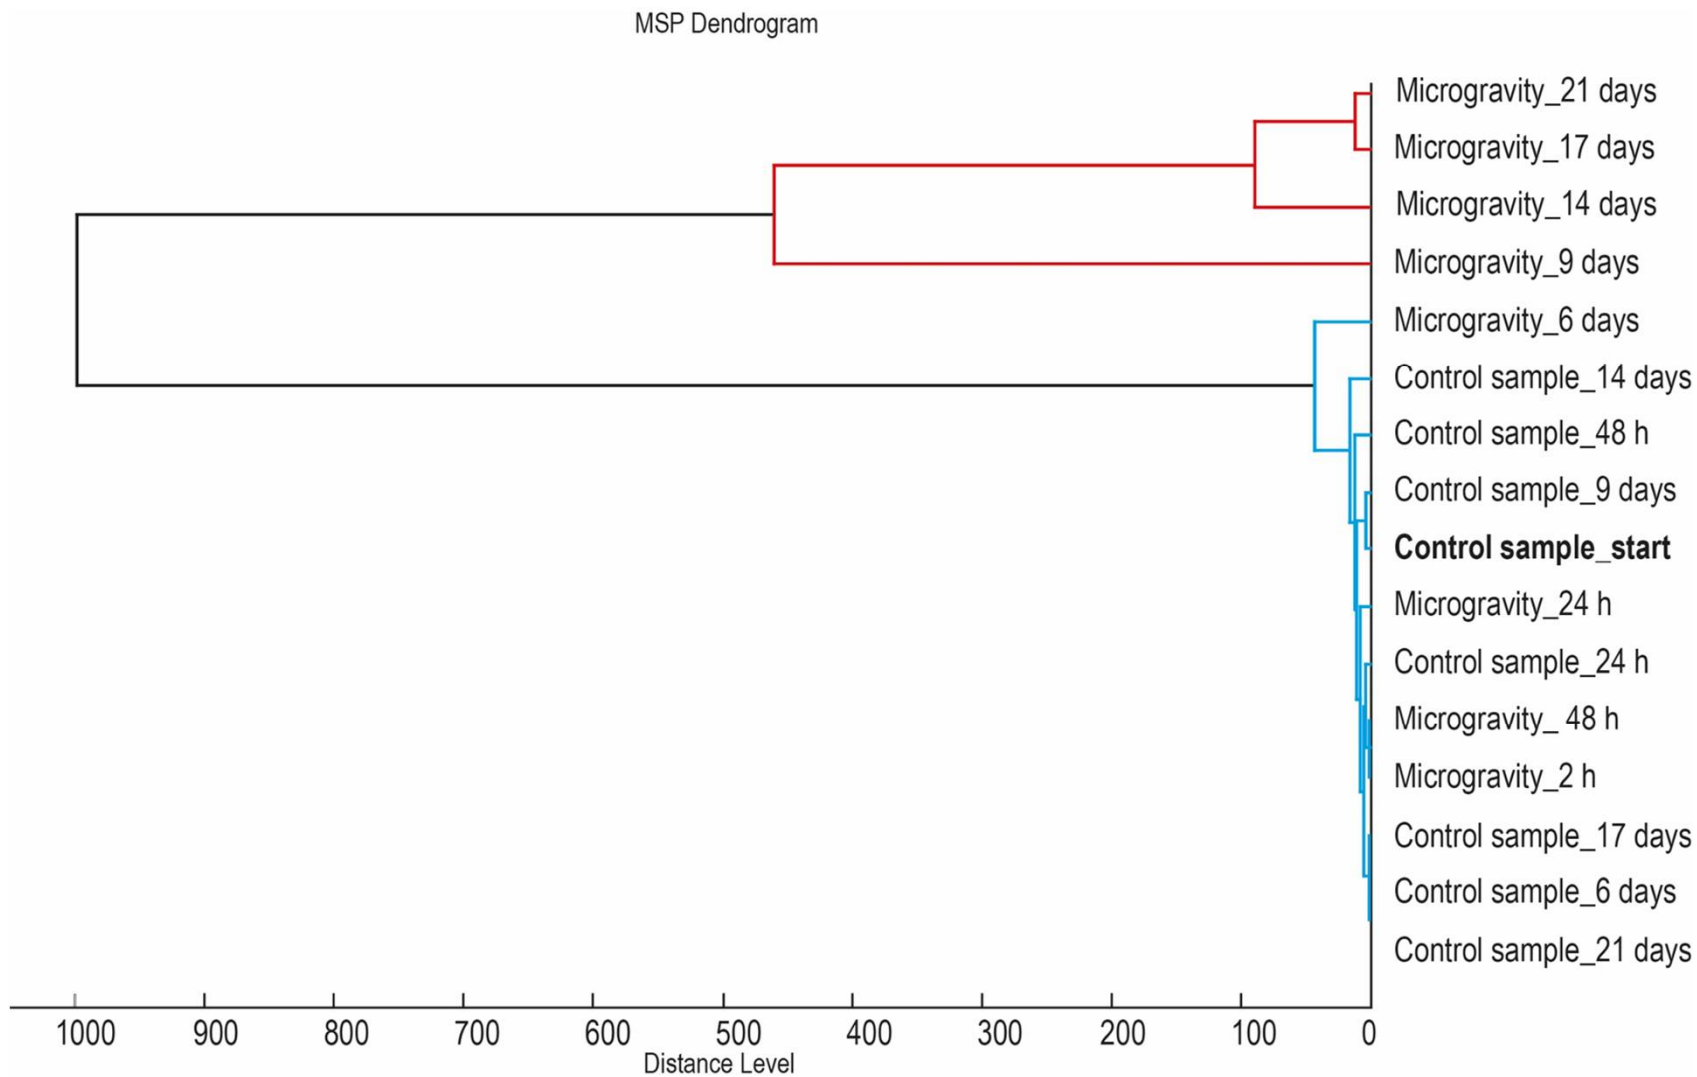

Supplement: s1 [file s1]
