# Supplementary material for: The Influence of Metabolic Inhibitors, Antibiotics, and Microgravity on Intact Cell MALDI-TOF Mass Spectra of the Cyanobacterium Synechococcus Sp. UPOC S4
Source: MDPI journal article supplement (doi:10.3390/molecules26061683), 2021-03-17
Supplement: s1 [file s1]

Šebela, M.; Raus, M.; Ondřej, V.; Hašler, P. The influence of metabolic inhibitors, antibiotics and microgravity on intact cell MALDI-TOF mass spectra of the cyanobacterium *Synechococcus* sp. UPOC S4.

### **Supplementary file 1**

Assigning of peaks from intact cell MALDI-TOF mass spectra of *Synechococcus* sp. UPOC S4 to amino acid sequences from the UniProt database. This assignment was achieved using pFilter accessible at <https://software.cr-hana.upol.cz/pfilter/>. The term “MISSING IN CONTROL” refers to those peaks, which appeared in a sample spectrum but were not present in the respective control spectrum. The term “MISSING IN SAMPLE” refers to a comparison in the opposite direction.

### **ANTIMYCIN A**

#### **1 and 2 µM, 1 week**

**MISSING IN CONTROL:** 20 peaks, uncharacterized proteins plus m/z 3443.74 PSBT\_SYNR3 Photosystem II reaction center protein T; m/z 6370.62 Q05WR3\_9SYNE Possible high light inducible protein; m/z 6370.62 A4CU05\_SYNPV Uncharacterized protein - Amidinotransferase super family; m/z 7706.62 Q0IBT9\_SYNS3 Possible SAP domain - Nif11 domain; m/z 8677.30 A5GQ62\_SYNR3 Uncharacterized protein - hercynine metabolism small protein; m/z 8677.30 1 uM K9RU07\_SYNP3 Ferredoxin; m/z 8677.30 1 uM A0A1J0PAE3\_9SYNE Acyl carrier protein; m/z 8677.30 1 uM A3YVC4\_9SYNE Uncharacterized protein - Cell division protein SepF; m/z 8692.09 YiaG super family, DNA-binding transcriptional regulator YiaG; m/z 9067.28 2 uM K9RQM6\_SYNP3 Putative redox protein, regulator of disulfide bond formation; m/z 9067.28 2 uM Q0IBQ1\_SYNS3 Nif11 domain-containing protein; m/z 9128.53 2 uM NDHO\_SYNPW NAD(P)H-quinone oxidoreductase subunit O; m/z 12240.03 Y026\_SYNS3 Nucleoid-associated protein sync\_0026; m/z 12576.10 Photosystem II reaction center Psb28 protein

**MISSING IN SAMPLE:** 2 peaks, only uncharacterized proteins

#### **5 and 10 µM, 1 week**

**MISSING IN CONTROL:** 18 peaks (at 5 µM), 25 peaks (at 10 µM), uncharacterized proteins plus m/z 3444.71 A0A4P7ZVD3\_9SYNE Photosystem II reaction center protein T; m/z 3638.09 10 uM Translocase; m/z 4361.43 Q05XI0\_9SYNE Cytochrome b6-f complex subunit 7; m/z 4361.43 A3YYM8\_9SYNE Photosystem II protein Y; m/z 4380.59 RL36\_SYNS9 50S ribosomal protein L36

**MISSING IN SAMPLE:** 2 peaks (5 and 10  $\mu$ M) including m/z 8708.98 K9SS39\_9SYNE Photosystem I reaction center subunit PsaK

1 and 2  $\mu$ M, 3 weeks

**MISSING IN CONTROL:** 3 peaks including m/z 6153.17 2 uM Q3B0Y5\_SYNS9 General secretion pathway protein E; m/z 6153.17 2 uM Q0IAS5\_SYNS3 Ferrochelatase; m/z 6153.17 2 uM Q3B0V3\_SYNS9 High light-inducible protein-like; m/z 6153.17 Q3B0V3\_SYNS9 High light-inducible protein-like

**MISSING IN SAMPLE:** 31 peaks, uncharacterized proteins plus m/z 4429.12 A0A1J0PAG3\_9SYNE Photosystem II reaction center protein I; m/z 4858.50 Q3AY61\_SYNS9 Possible high light inducible protein; m/z 6115.87 A3YXR5\_9SYNE PCP\_red domain-containing protein; m/z 6680.04 K9SUE7\_9SYNE Copper chaperone; m/z 6939.69 B1XKM3\_SYNP2 Conserved hypothetical membrane protein; m/z 7084.66 B1XKL5\_SYNP2 Chaperone protein domain protein; m/z 7193.64 K9RSN2\_SYNP3 Photosystem II reaction center protein K; m/z 8324.51 B1XPV2\_SYNP2 30S ribosomal protein S18; m/z 9130.66 Q05QL5\_9SYNE Possible SAP domain; m/z 9142.47 NDHL\_SYNPW NAD(P)H-quinone oxidoreductase subunit L; m/z 9142.47 A0A2P7EBS2\_9SYNE GMC oxidoreductase (Fragment); m/z 10314.88 K9STH7\_9SYNE Transposase; m/z 10314.88 YIDD\_SYNS9 Putative membrane protein insertion efficiency factor; m/z 10764.46 A0A164CRS2\_9SYNE Uncharacterized protein - DnaJ super family, DnaJ-class molecular chaperone with C-terminal Zn finger domain; m/z 12206.4 A3YUU8\_9SYNE Uncharacterized protein - PRK07375, Na<sup>+</sup>/H<sup>+</sup> antiporter subunit C; m/z 12243.8 B1XPW9\_SYNP2 Arsenical resistance operon repressor, ArsR family; m/z 12420.08 A0A1J0P969\_9SYNE Uncharacterized protein - MopB\_CT superfamily, Molybdopterin-Binding, C-terminal (MopB\_CT) domain; m/z 12420.08 K9SUE0\_9SYNE Cupin\_7 domain-containing protein

5 and 10  $\mu$ M, 3 weeks

**MISSING IN CONTROL:** no peak was missing

**MISSING IN SAMPLE:** numerous peaks disappeared

**AZIDE**

2 and 5  $\mu$ M, 2 weeks

**MISSING IN CONTROL:** 11 peaks, uncharacterized proteins plus m/z 5064.10 A5GIA9\_SYNPW Cytochrome b559 subunit beta; m/z 5224.27 PSBK\_SYNPW Photosystem II reaction center protein K; m/z 7047.75 A0A2P7EC83\_9SYNE Photosystem II reaction center protein J; m/z 7051.62 NBLA\_SYNE7 Phycobilisome degradation protein NblA

**MISSING IN SAMPLE:** no difference

10  $\mu$ M, 2 weeks

**MISSING IN CONTROL:** 39 peaks, uncharacterized proteins plus m/z 3872.48 A3Z0W3\_9SYNE Uncharacterized protein - PIN\_SF super family; m/z 3889.18 A3YUT5\_9SYNE Photosystem II reaction center protein M; m/z 4080.56 K9SR44\_9SYNE Photosystem II reaction center protein T; m/z 4100.92 A0A0G8AWI1\_9SYNE Cytochrome b6-f complex subunit 5; m/z 4112.87 A0A164BUR5\_9SYNE Photosystem I reaction center subunit VIII; m/z 4297.12 A0A164B792\_9SYNE Photosystem II protein Y; m/z 4764.83 PSBF\_SYNP2 Cytochrome b559 subunit beta; m/z 4907.10 A3YZK2\_9SYNE Possible high light inducible protein; m/z 4907.10 A0A2P7EAR9\_9SYNE DNA polymerase subunit beta (Fragment); m/z 4997.24 A0A2P7EAR9\_9SYNE DNA polymerase subunit beta (Fragment); m/z 6454.65 A5GI63\_SYNPW Uncharacterized protein - NdhS, NAD(P)H dehydrogenase subunit S; m/z 10259.9 Q3AZP3\_SYNS9 Possible acyl carrier protein; m/z 10259.9 A5GU92\_SYNR3 Predicted enzyme of the cupin superfamily; m/z 10259.93 B4WQD9\_SYNS7 YCII-related domain superfamily; m/z 10316.30 A0A4V1DHG1\_9SYNE YCII domain-containing protein

**MISSING IN SAMPLE:** 24 peaks, uncharacterized proteins plus m/z 4896.64 K9SYJ1\_9SYNE Photosystem II reaction center protein Ycf12; m/z 5983.25 Q05TX4\_9SYNE Uncharacterized protein - G3P\_acyltransf super family; m/z 6165.01 A4CU28\_SYNPV Putative hydroxylase; m/z 6917.87 B4WLS7\_SYNS7 Uncharacterized protein - Cys\_rich\_CPXG; m/z 6935.76 A0A0G8ARK5\_9SYNE Photosystem II reaction center protein J; m/z 8343.64 A5GNK4\_SYNPW CP12 domain-containing protein; m/z 8724.39 A0A2P7EFI8\_9SYNE Protein translocase subunit SecE; m/z 8724.39 A5GT09\_SYNR3 Predicted periplasmic or secreted lipoprotein; m/z 8764.02 Q3AYN7\_SYNS9 Possible high light inducible protein; m/z 8764.02 Q05TX2\_9SYNE Antitoxin; m/z 9780.29 50S ribosomal protein L27; m/z 12403.77 B4WSH1\_SYNS7 Photosystem II reaction center Psb28 protein

#### 2 and 5 $\mu$ M, 3 weeks

**MISSING IN CONTROL:** 14 peaks, uncharacterized proteins plus m/z 4719.88 K9SUR2\_9SYNE Cytochrome b559 subunit beta; m/z 5121.15 A0A1J0PBS6\_9SYNE High light inducible protein; m/z 5121.15 A3Z318\_9SYNE Glutaredoxin-related protein (Fragment); m/z 7308.65 A0A4P7ZUJ9\_9SYNE Photosystem II reaction center protein H; m/z 9351.08 A0A164CHG7\_9SYNE Molybdopterin synthase sulfur carrier subunit

**MISSING IN SAMPLE:** 15 peaks, uncharacterized proteins plus m/z 5272.37 A5GN15\_SYNPW Conserved hypothetical membrane protein; m/z 6579.14 Q0I6T3\_SYNS3 Putative inner membrane protein; m/z 7572.62 Q0I6F2\_SYNS3 Putative transcriptional regulator; m/z 7861.06 B1XKL4\_SYNP2 Ferredoxin-thioredoxin reductase variable chain; m/z 7963.73 NDHO\_SYNJIB NAD(P)H-quinone oxidoreductase subunit O; m/z 7963.73 A0A1J0PC15\_9SYNE Thiamine biosynthesis protein ThiS; m/z 7963.73 Q2JK49\_SYNJIB CAB/ELIP/HLIP family protein; m/z 8712.62 A5GPD7\_SYNPW Protein translocase subunit SecE

#### 10 $\mu$ M, 3 weeks

**MISSING IN CONTROL:** 33 peaks, uncharacterized proteins plus m/z 3164.66 Cytochrome b6-f complex subunit 8; m/z 3594.45 PETN\_SYNPW Cytochrome b6-f complex subunit 8; m/z 3812.22 PSBM\_SYNR3 Photosystem II reaction center protein M; m/z 3873.99 K9RVZ0\_SYNP3 Photosystem II reaction center protein M; m/z 4082.61 K9SR44\_9SYNE Photosystem II reaction center protein T; m/z 4226.23 B4WM03\_SYNS7 Photosystem II reaction center protein I; m/z 4297.63 A0A164B792\_9SYNE Photosystem II protein Y; m/z 4655.46 A3YYU1\_9SYNE Uncharacterized protein HTH\_55 super family, RctB helix turn helix domain; m/z 4844.49 Q0I7S6\_SYNS3 Photosystem II protein Y; m/z 4912.08 B4WQE6\_SYNS7 DDE\_Tnp\_IS240 domain-containing protein; m/z 4959.73 K9RS61\_SYNP3 Photosystem I reaction center subunit IX; m/z 5105.81 PSBF\_SYNS9 Cytochrome b559 subunit beta; m/z 5121.46 A0A1J0PBS6\_9SYNE High light inducible protein; m/z 5121.46 K9SQX4\_9SYNE Uncharacterized protein - ExoD super family, Exopolysaccharide synthesis; m/z 5121.46 A3Z318\_9SYNE Glutaredoxin-related protein (Fragment); m/z 5344.85 K9RT21\_SYNP3 Uncharacterized protein HicB, Predicted nuclease of the RNase H fold; m/z 6891.09 K9RTR4\_SYNP3 50S ribosomal protein L32

**MISSING IN SAMPLE:** 44 peaks, uncharacterized proteins plus m/z 4896.62 K9SYJ1\_9SYNE Photosystem II reaction center protein Ycf12; m/z 5272.37 A5GN15\_SYNPW Conserved hypothetical membrane protein;

m/z 5997.26 B1XIS0\_SYNP2 Conserved hypothetical membrane protein; m/z 6165.65 A4CU28\_SYNPV Putative hydroxylase; m/z 6294.48 A0A4P7ZXQ6\_9SYNE RHH\_5 domain-containing protein; m/z 6408.12 K9SVD1\_9SYNE Sec-independent protein translocase protein TatA; m/z 6579.14 Q0I6T3\_SYNS3 Putative inner membrane protein; m/z 6788.29 A0A4V1DI31\_9SYNE High light inducible protein; m/z 6937.00 B1XKM3\_SYNP2 Conserved hypothetical membrane protein; m/z 7629.61 RL33\_SYNS9 50S ribosomal protein L33; m/z 7663.31 A0A164C6F4\_9SYNE Photosystem I reaction center subunit IV; m/z 7663.31 K9RVM2\_SYNP3 Uncharacterized protein NdhS, NAD(P)H dehydrogenase subunit S; m/z 7963.73 Q2JK49\_SYNJB CAB/ELIP/HLIP family protein; m/z 7963.73 A0A1J0PC15\_9SYNE Thiamine biosynthesis protein ThiS; m/z 7963.73 NDHO\_SYNJB NAD(P)H-quinone oxidoreductase subunit O; m/z 9741.52 A4CXC4\_SYNPV NAD(P)H-quinone oxidoreductase subunit; m/z 9741.52 A3Z2T2\_9SYNE Putative multidrug efflux ABC transporter (Fragment); m/z 9794.99 RL31\_SYNS3 50S ribosomal protein L31; m/z 11513.60 Q0ID52\_SYNS3 Uncharacterized yci family conserved protein

## BROMOPYRUVIC ACID

1 – 5  $\mu$ M, 1 week

**MISSING IN CONTROL:** no significant changes

**MISSING IN SAMPLE:** no significant changes

2 and 5  $\mu$ M, 2 weeks

**MISSING IN CONTROL:** 10 peaks, uncharacterized proteins plus m/z 3057.24 PSAM\_SYNJB Photosystem I reaction center subunit XII; m/z 4041.47 PSBJ\_SYNJB Photosystem II reaction center protein J; m/z 4406.08 A0A164CVM2\_9SYNE Photosystem I reaction center subunit IX; m/z 7396.07 2 $\mu$ M A5GUT0\_SYNR3 Sulfur transfer protein involved in thiamine biosynthesis; m/z 8875.83 2 $\mu$ M A0A1J0PE26\_9SYNE Exodeoxyribonuclease 7 small subunit; m/z 8875.83 2 $\mu$ M Q05RG5\_9SYNE Putative carboxysome peptide B; m/z 9040.23 B4WH35\_SYNS7 50S ribosomal protein L28; m/z 10198.26 2 $\mu$ M RS15\_SYNS9 30S ribosomal protein S15; m/z 10198.26 2 $\mu$ M A0A0G8AXA2\_9SYNE Cell division topological specificity factor; m/z 13984.01 2 $\mu$ M K9SSQ4\_9SYNE ATP synthase epsilon chain; m/z 13984.01 2 $\mu$ M B1XI33\_SYNP2 Glyoxalase\_6 domain-containing protein; m/z 14373.91 2  $\mu$ M A0A1J0P8I1\_9SYNE DNA-binding protein; m/z 14373.91 2  $\mu$ M A3Z2U0\_9SYNE Heat shock protein DnaJ-like

**MISSING IN SAMPLE:** 20 peaks, uncharacterized proteins plus m/z 3286.32 PETM\_SYNR3 Cytochrome b6-f complex subunit 7; m/z 3854.36 Q05SW8\_9SYNE Branched-chain amino acid aminotransferase; m/z 5299.83 A3Z2N9\_9SYNE Glutamate 5-kinase, ProB-related; m/z 5854.00 Q0IDS1\_SYNS3 Uncharacterized protein - NTase\_sub\_bind super family, Nucleotidyltransferase substrate binding protein like; m/z 6180.11 RL32\_SYNS9 50S ribosomal protein L32; m/z 6571.67 A0A164B4C6\_9SYNE Cytochrome b6-f complex subunit 5; m/z 6571.67 K9SQK4\_9SYNE Uncharacterized protein - COG3415 super family, transposase [Mobilome: prophages, transposons]; m/z 7312.37 A0A162BKL1\_9SYNE Nif11 domain-containing protein; m/z 8206.35 Q3AUQ7\_SYNS9 Sec-independent protein translocase protein TatA; m/z 8206.35 A0A4P7ZTGO\_9SYNE Sulfur carrier protein ThiS

#### 10 $\mu$ M, 1 and 2 weeks

**MISSING IN CONTROL:** 28 peaks after 1 week of incubation (almost all these signals were missing after 2 weeks), uncharacterized proteins plus m/z 3517.27 PETN\_SYNR3 Cytochrome b6-f complex subunit 8; m/z 4455.44 K9STJ1\_9SYNE Uncharacterized protein - PLN00180 super family, NDF6 (NDH-dependent flow 6); m/z 7130.37 A3Z2C8\_9SYNE Sigma factor SigF; m/z 7307.50 A0A4P7ZUJ9\_9SYNE Photosystem II reaction center protein H; m/z 7307.50 Q05W71\_9SYNE Possible high light inducible protein; m/z 8025.83 K9RWY0\_SYNP3 Ferredoxin; m/z 9037.00 A5GUA2\_SYNR3 Uncharacterized protein - Aquarius\_N super family, Intron-binding protein aquarius N-terminus; m/z 9188.29 A0A0G8AXP1\_9SYNE Uncharacterized protein - small\_w\_EgtBD super family, hercynine metabolism small protein; m/z 9802.61 Q3AZD0\_SYNS9 Bacterial nucleoid protein Hbs - histone-like DNA-binding protein HU

**MISSING IN SAMPLE:** 40 peaks, uncharacterized proteins plus m/z 3765.29 K9SW16\_9SYNE Cytochrome B6-F complex subunit 5; m/z 3815.77 K9RXC9\_SYNP3 Photosystem II reaction center protein T; m/z 3815.77 A0A1J0P8S9\_9SYNE Photosystem II reaction center protein Ycf12; m/z 4432.62 PSAJ\_SYNR3 Photosystem I reaction center subunit IX; m/z 5399.39 A0A164CW13\_9SYNE Uncharacterized protein - Phytase-like super family; m/z 5540.67 A3YXF2\_9SYNE Photosystem II reaction center protein K; m/z 5997.66 B1XIS0\_SYNP2 Conserved hypothetical membrane protein; m/z 6070.47 B4WRS1\_SYNS7 Uncharacterized protein - GST\_C\_family super family, -terminal, alpha helical domain of the Glutathione S-transferase family; m/z 6165.62 A4CU28\_SYNPV Putative hydroxylase; m/z 6331.58 B4WKF5\_SYNS7 Uncharacterized protein - PRK07208 super family; m/z 6346.23 Q0I967\_SYNS3 Uncharacterized protein - NADB\_Rossmann super family; m/z 6426.47 A0A164CQ37\_9SYNE Uncharacterized protein - NdhS, NAD(P)H dehydrogenase subunit S; m/z 6683.20 - Q3B0S1\_SYNS9 Photosystem II reaction center protein

Z; m/z 7517.90 A5GKZ1\_SYNPW Zn-ribbon protein; m/z 7517.90 A5GRA1\_SYNR3 Uncharacterized conserved membrane protein - Pmp3, Proteolipid membrane potential modulator; m/z 7629.62 RL33\_SYNS9 50S ribosomal protein L33; m/z 7664.05 A0A164C6F4\_9SYNE Photosystem I reaction center subunit IV; m/z 7664.05 K9RVM2\_SYNP3 Uncharacterized protein - NdhS, NAD(P)H dehydrogenase subunit S; m/z 7664.05 Q05RA3\_9SYNE Nif11 domain-containing protein; m/z 7962.73 NDHO\_SYNJB NAD(P)H-quinone oxidoreductase subunit O; m/z 8206.35 Q3AUQ7\_SYNS9 Sec-independent protein translocase protein TatA; m/z 8206.35 A0A4P7ZTG0\_9SYNE Sulfur carrier protein ThiS; m/z 8762.98 K9SS07\_9SYNE DNA-directed RNA polymerase subunit omega; m/z 8762.98 A5GS68\_SYNR3 Carboxysome peptide B; m/z 9721.41 Q3AZ30\_SYNS9 Bacterial translation initiation factor 1 (BIF-1); m/z 9721.41 Q05XK8\_9SYNE Translation initiation factor IF-1; m/z 9738.37 A0A4P7ZUR7\_9SYNE CopG family transcriptional regulator; m/z 9738.37 A5GMC7\_SYNPW Uncharacterized conserved membrane protein - kdpB super family, K<sup>+</sup>-transporting ATPase, B subunit; m/z 9795.32 RL31\_SYNS3 50S ribosomal protein L31

#### 2 $\mu$ M, 3 weeks

**MISSING IN CONTROL:** 1 peak, m/z 8769.86 A4CWR9\_SYNPV UPF0033 domain-containing protein - SirA\_YedF\_YeeD, irA, YedF, and YeeD. Two-layered alpha/beta sandwich domain

**MISSING IN SAMPLE:** 8 peaks, uncharacterized proteins plus m/z 5273.20 A5GN15\_SYNPW Conserved hypothetical membrane protein; m/z 5914.73 A4CT42\_SYNPV PCP\_red domain-containing protein

#### 5 $\mu$ M, 3 weeks

**MISSING IN CONTROL:** 2 peaks including m/z 7106.65 A0A4P7ZUN2\_9SYNE RHH\_5 domain-containing protein; m/z 7913.07 ATPL\_SYNS9 ATP synthase subunit c

**MISSING IN SAMPLE:** numerous peaks were missing

#### 10 $\mu$ M, 3 weeks

**MISSING IN CONTROL:** no differential peaks

**MISSING IN SAMPLE:** almost all peaks were missing

## DEOXYGLUCOSE

### 1 and 2 $\mu$ M, 1 week

**MISSING IN CONTROL:** 9 peaks (at 1  $\mu$ M), 8 peaks (at 2  $\mu$ M), uncharacterized proteins

**MISSING IN SAMPLE:** 4 peaks, uncharacterized proteins

### 5 and 10 $\mu$ M, 1 week

**MISSING IN CONTROL:** 24 peaks (at 5  $\mu$ M), 5 peaks (at 10  $\mu$ M), uncharacterized proteins plus

5  $\mu$ M – m/z 5237.24 Q05TE9\_9SYNE Phycocyanobilin:ferredoxin oxidoreductase, m/z 5269.97 K9SW43\_9SYNE 50S ribosomal protein L34, m/z 5950.52 valyl-tRNA synthetase, m/z 6093.95 A4CU00\_SYNPV Nif11 domain-containing protein, m/z 6278.87 A4CWX9\_SYNPV Cyanate hydratase, m/z 6662.88 Q05UL3\_9SYNE Photosystem II reaction center protein Z,

10  $\mu$ M – m/z 5251.95 Q0I8E4\_SYNS3 Lhc-like protein LhI4

**MISSING IN SAMPLE:** 6 peaks, uncharacterized proteins plus m/z 8872.91 A4CUL1\_SYNPV 50S ribosomal protein L28, m/z 12413.95 B4WJM2\_SYNS7 2Fe-2S ferredoxin-type domain-containing protein

### 1 and 2 $\mu$ M, 2 weeks

**MISSING IN CONTROL:** 11 peaks (at 1  $\mu$ M), 17 peaks (at 2  $\mu$ M), uncharacterized proteins plus

1  $\mu$ M – m/z 5803.10 Q3AZA1\_SYNS9 Putative high light inducible protein, m/z 5982.24 A0A4P7ZY82\_9SYNE Cytochrome B6, m/z 10309.6 K9SZ84\_9SYNE Putative transcriptional regulator

2  $\mu$ M – m/z 3812.30 PSBM\_SYNR3 Photosystem II reaction center protein M, m/z 6664.24 PSBZ\_SYNJB Photosystem II reaction center protein Z, m/z 6863.59 A3Z082\_9SYNE Uncharacterized protein NAD(P)<sup>+</sup>-dependent aldehyde dehydrogenase superfamily / Q0I7D7\_SYNS3 Possible high light inducible protein-related protein,

**MISSING IN SAMPLE:** 11 peaks (at 1  $\mu$ M), 12 peaks (at 2  $\mu$ M), uncharacterized proteins plus

1  $\mu$ M – m/z 11019.56 A0A163ZQG7\_9SYNE Aspartyl/glutamyl-tRNA(Asn/Gln) amidotransferase subunit

2  $\mu$ M – m/z 5034.03 A5GQF3\_SYNR3 Cytochrome b559 subunit beta/ Q0I7Z7\_SYNS3 Lhc-like protein LhI4



1 and 2  $\mu$ M – m/z 4765.27 PSBF\_SYNP2 Cytochrome b559 subunit beta, m/z 11736.72 A4CRP3\_SYNPV Thioredoxin

#### 5 and 10 $\mu$ M, 2 weeks

**MISSING IN CONTROL:** 24 peaks (at 5  $\mu$ M), 13 peaks (at 10  $\mu$ M), uncharacterized proteins plus

5  $\mu$ M – m/z 5952.43 valyl-tRNA synthetase, m/z 6095.30 A4CU00\_SYNPV Nif11 domain-containing protein, /z 6536.36 K9RPF0\_SYNP3 CsbD domain-containing protein, m/z 7048.71 K9SP56\_9SYNE Photosystem II reaction center protein H, m/z 7922.45 A3YYG0\_9SYNE Putative high light inducible protein, m/z 9012.96 Q05TX6\_9SYNE Antitoxin, m/z 10301.43 A5GT93\_SYNR3 CP12 domain-containing protein

10  $\mu$ M – m/z 5616.59 A0A1J0PA22\_9SYNE UPF0391 membrane protein, m/z 6191.88 Q05Q08\_9SYNE Possible transcriptional regulator, luxR family protein, m/z 6535.72 K9RPF0\_SYNP3 CsbD domain-containing protein, m/z 7944.18 A0A1J0PCN5\_9SYNE Ferredoxin / B4WSJ5\_SYNS7 Photosystem I reaction center subunit IV, m/z 9012.75 Q05TX6\_9SYNE Antitoxin

**MISSING IN SAMPLE:** 8 peaks (at 5  $\mu$ M), 11 peaks (at 10  $\mu$ M), uncharacterized proteins plus

10  $\mu$ M – m/z 3571.58 PSAM\_SYNS9 Photosystem I reaction center subunit XII, m/z 7614.12 PSAE\_SYNS9 Photosystem I reaction center subunit IV, m/z 9936.31 A0A2P7EFU2\_9SYNE 4a-hydroxytetrahydrobiopterin dehydratase,

5 and 10  $\mu$ M m/z 11736.71 A4CRP3\_SYNPV Thioredoxin, m/z 11844.24 Q3AZL8\_SYNS9 Ferredoxin (2Fe-2S), m/z 12246.92 K9RQQ2\_SYNP3 Putative transcriptional regulator

#### 1 and 2 $\mu$ M, 3 weeks

**MISSING IN CONTROL:** 12 peaks (at 1  $\mu$ M), 7 peaks (at 2  $\mu$ M), uncharacterized proteins plus

1  $\mu$ M – m/z 6666.63 A0A4P7ZTH0\_9SYNE Photosystem II reaction center protein Z, m/z 6997.93 A0A4P7ZW72\_9SYNE Photosystem II reaction center protein J, m/z 9013.65 Q05TX6\_9SYNE Antitoxin,

2  $\mu$ M – m/z 7504.47 7504.47 B4WG39\_SYNS7 Uncharacterized protein, EamA-like transporter family, m/z 7704.62 A0A4P7ZRH5\_9SYNE Ferredoxin, m/z 7757.42 A5GV83\_SYNR3 Phycobilisome 7.8 kDa linker

polypeptide, allophycocyanin-associated, core, m/z 11393.16 A0A164B4A7\_9SYNE Cytochrome c6, m/z 11693.06 A5GV69\_SYNR3 Ferredoxin

**MISSING IN SAMPLE:** 7 peaks (at 2  $\mu$ M), uncharacterized proteins plus

2  $\mu$ M – m/z 6500.13 Q3AZH3\_SYNS9 Nif11 domain-containing protein, m/z 7107.07 A0A4P7ZUN2\_9SYNE RHH\_5 domain-containing protein, m/z 7807.31 A0A4P7ZQK1\_9SYNE Nif11-like leader peptide family natural product, m/z 9136.27 A5GI41\_SYNPW Uncharacterized protein, hercynine metabolism small protein

#### 5 and 10 $\mu$ M, 3 weeks

**MISSING IN CONTROL:** 14 peaks (at 5  $\mu$ M), 12 peaks (at 10  $\mu$ M), uncharacterized proteins plus

5  $\mu$ M – m/z 3766.14 K9SW16\_9SYNE Cytochrome B6-F complex subunit 5, m/z 4003.62 P95823\_SYNE7 Photosystem I Psal protein, m/z 6923.78 A0A4P7ZUJ6\_9SYNE CopG family transcriptional regulator, m/z 7813.96 Q0I950\_SYNS3 Possible high light inducible protein-related protein / A3YVN2\_9SYNE Phycobilisome 7.8 kDa linker polypeptide, allophycocyanin-associated, core, m/z 9072.32 Q05VL8\_9SYNE Glutaredoxin, m/z 9745.22 A3YZ34\_9SYNE 4a-hydroxytetrahydrobiopterin dehydratase, m/z 12023.8 Q3B072\_SYNS9 NAD(P)H-quinone oxidoreductase subunit 4L, m/z 12670.7 Q31QE9\_SYNE7 Transcriptional regulator, ArsR family

10  $\mu$ M – m/z 6115.11 Chlorophyll A-B binding protein, m/z 9270.74 A5GV49\_SYNR3 Ferredoxin-thioredoxin reductase, variable chain, m/z 10978.92 A0A1J0P9G7\_9SYNE Addiction module antitoxin RelB, m/z 11395.45 K9STF0\_9SYNE NIL domain-containing protein

5 and 10  $\mu$ M – m/z 10518.35 Q3AWV1\_SYNS9 4a-hydroxytetrahydrobiopterin dehydratase / A0A1J0PD95\_9SYNE Carbon dioxide-concentrating protein CcmK

**MISSING IN SAMPLE:** 4 peaks (at 5  $\mu$ M), 18 peaks (at 10  $\mu$ M), uncharacterized proteins plus

10  $\mu$ M – m/z 5934.89 K9S0C9\_SYNP3 Chlorophyll A-B binding protein, m/z 6151.76 Q3B0V3\_SYNS9 High light-inducible protein-like, m/z 6500.13 Q3AZH3\_SYNS9 Nif11 domain-containing protein, m/z 6521.36 K9SWP9\_9SYNE CsbD domain-containing protein, m/z 6537.38 A0A4P7ZVT8\_9SYNE Ribbon-helix-helix protein, CopG family, m/z 7321.16 A0A164A3E5\_9SYNE Uncharacterized protein, DNA topoisomerase 4 subunit A, m/z 7807.31 A0A4P7ZQK1\_9SYNE Nif11-like leader peptide family natural product, m/z 10164.11 A0A4P7ZXV3\_9SYNE Cell division protein SepF

5 and 10  $\mu$ M – m/z 5863.19 A5GPZ9\_SYNR3 HLIP family protein

## FLUOROACETIC ACID

1 and 2  $\mu$ M, 1 week

**MISSING IN CONTROL:** 22 peaks, uncharacterized proteins plus

1  $\mu$ M – m/z 5681.35 A5GNH0\_SYNPW High light inducible protein / A3YU00\_9SYNE Nif11 domain-containing protein, m/z 6102.46 B1XIJ1\_SYNP2 High light inducible protein hli5, m/z 6192.62 Q05Q08\_9SYNE Possible transcriptional regulator, luxR family protein, m/z 6580.72 Q0I6T3\_SYNS3 Putative inner membrane protein, m/z 7176.82 A5GNP5\_SYNPW High light inducible protein, m/z 7306.04 Q2JP93\_SYNJB Molybdenum-pterin binding domain protein, m/z 7779.32 A4CXM7\_SYNPV Possible high light inducible protein, m/z 9776.22 A5GR75\_SYNR3 DNA-binding protein HU / Q05SB4\_9SYNE Nif11 domain-containing protein

2  $\mu$ M – m/z 5252.61 Q0I8E4\_SYNS3 Lhc-like protein Lhl4, m/z 5737.61 A3Z2H0\_9SYNE Aspartate aminotransferase, m/z 6861.19 Q0I8E5\_SYNS3 Putative high light inducible protein, m/z 7613.70 PSAE\_SYNS9 Photosystem I reaction center subunit IV / B4WUC4\_SYNS7 DDE\_Tnp\_Tn3 domain-containing protein,

**MISSING IN SAMPLE:** 3 peaks, including m/z 9852.53 A4CVP3\_SYNPV Ferredoxin, m/z 10318.99 A4CY55\_SYNPV Guanosine-3',5'-bis(Diphosphate) 3'-diphosphatase, (PpGpp)ase

5 and 10  $\mu$ M, 1 week

**MISSING IN CONTROL:** 14 peaks (at 5  $\mu$ M), 4 peaks (at 10  $\mu$ M), uncharacterized proteins plus

5  $\mu$ M – m/z 3764.24 K9SW16\_9SYNE Cytochrome B6-F complex subunit 5, m/z 3813.14 PSBM\_SYNR3 Photosystem II reaction center protein M, m/z 5269.73 K9SW43\_9SYNE 50S ribosomal protein L34, m/z 6094.18 A4CU00\_SYNPV Nif11 domain-containing protein, m/z 7614.35 PSAE\_SYNS9 Photosystem I reaction center subunit IV, m/z 7688.95 A0A4P7ZS73\_9SYNE Ribbon-helix-helix protein, CopG family, m/z 7948.45, B1XKY2\_SYNP2 Ferredoxin / A0A4P7ZRM0\_9SYNE Acetyltransferase / B4WFM6\_SYNS7 Uncharacterized protein, VapB\_antitoxin Bacterial antitoxin of type II TA system, VapB, m/z 7963.88 NDHO\_SYNJB NAD(P)H-quinone oxidoreductase subunit O, m/z 8713.04 A5GPD7\_SYNPW Protein translocase subunit SecE

10  $\mu$ M – m/z 6094.18 A4CU00\_SYNPV Nif11 domain-containing protein,

**MISSING IN SAMPLE:** 1 peak, uncharacterized protein

#### 1 and 2 $\mu$ M, 2 weeks

**MISSING IN CONTROL:** 16 peaks, uncharacterized proteins plus

1  $\mu$ M – m/z 4546.04 Q05VL7\_SYNE Peptide chain release factor 2, m/z 4741.64 YCF12\_SYNP2 Photosystem II reaction center protein Ycf12, m/z 5080.38 K9RSW9\_SYNP3 Cytochrome b559 subunit beta, m/z 7436.99 A5GJR2\_SYNPW Nif11 domain-containing protein, m/z 8036.83 B4WIY0\_SYNS7 Ferredoxin, m/z 9135.30 NDHO\_SYNS9 NAD(P)H-quinone oxidoreductase subunit O, m/z 9146.39 Q3AVY9\_SYNS9 Glutaredoxin, m/z 11133.56 A4CWI1\_SYNPV Ribonucleotide reductase (Class II) / Q31RE9\_SYNE7 Ferredoxin (2Fe-2S), m/z 11817.36 A0A1J0P8W2\_SYNE Glutaredoxin

2  $\mu$ M – m/z 3765.64 K9SW16\_SYNE Cytochrome B6-F complex subunit 5, m/z 7649.37 K9SXJ5\_SYNE Photosystem I reaction center subunit IV / A0A1J0PD21\_SYNE High light inducible protein,

**MISSING IN SAMPLE:** 14 peaks (at 1  $\mu$ M) and 15 (at 2  $\mu$ M) peaks uncharacterized plus m/z 3566.49 A0A164C392\_SYNE Cytochrome b6-f complex subunit 8, m/z 4432.41 PSAJ\_SYNR3 Photosystem I reaction center subunit IX, m/z 5914.05 A4CT42\_SYNPV PCP\_red domain-containing protein, m/z 5935.05 K9S0C9\_SYNP3 Chlorophyll A-B binding protein, m/z 6138.62 A0A4P7ZV86\_SYNE Protochlorophyllide oxidoreductase, m/z 6925.29 K9RZ10\_SYNP3 30S ribosomal protein S21, m/z 7963.74 NDHO\_SYNJB NAD(P)H-quinone oxidoreductase subunit O, m/z 9012.54 Q05TX6\_SYNE Antitoxin

#### 5 and 10 $\mu$ M, 2 weeks

**MISSING IN CONTROL:** 12 peaks, uncharacterized proteins plus

m/z 3829.00 Q05Q15\_SYNE Photosystem II reaction center protein M, m/z 4858.86 Q3AY61\_SYNS9 Possible high light inducible protein, m/z 4913.48 B4WQE6\_SYNS7 DDE\_Tnp\_IS240 domain-containing protein, m/z 5616.87 A0A1J0PA22\_SYNE UPF0391 membrane protein BM449\_05130, m/z 7647.45 Q3AX15\_SYNS9 ThiS, thiamine-biosynthesis, m/z 8712.51 A5GPD7\_SYNPW Protein translocase subunit SecE, m/z 8749.87 A0A1J0PE01\_SYNE Cell division protein SepF / A5GLQ2\_SYNPW High light inducible protein

**MISSING IN SAMPLE:** 10 peaks, uncharacterized proteins plus m/z 5935.05 K9S0C9\_SYNP3 Chlorophyll A-B binding protein, m/z 6370.75 Q05WR3\_9SYNE Possible high light inducible protein, m/z 6815.15 B4WSG7\_SYNS7 Proto-chlorophyllide reductase 57 kD subunit superfamily / A0A1J0PC22\_9SYNE Uncharacterized protein, SH3 super family Src Homology 3 domain superfamily

1 and 2  $\mu$ M, 3 weeks

**MISSING IN CONTROL:** 19 peaks (1  $\mu$ M), 13 peaks (2  $\mu$ M), uncharacterized proteins

1  $\mu$ M – m/z 3873.32 A3Z0W3\_9SYNE Uncharacterized protein, PIN (PiIT N terminus) domain: Superfamily, m/z 3874.73 K9RVZ0\_SYNP3 Photosystem II reaction center protein M, m/z 4020.79 A0A4P7ZWX4\_9SYNE Photosystem I reaction center subunit VIII, m/z 7558.06 PSBH\_SYNJB Photosystem II reaction center protein H, m/z 7575.47 RL35\_SYNS9 50S ribosomal protein L35, m/z 8714.28 A5GPD7\_SYNPW Protein translocase subunit SecE, m/z 9072.51 RL28\_SYNP2 50S ribosomal protein L28, m/z 9345.85 RS17\_SYNE7 30S ribosomal protein S17, m/z 9665.51 Q05UN9\_9SYNE 50S ribosomal protein L35 / B4WLZ0\_SYNS7 Putative membrane protein insertion efficiency factor

2  $\mu$ M – m/z 5121.12 A0A1J0PBS6\_9SYNE High light inducible protein, m/z 5342.65 K9RZM0\_SYNP3 Uncharacterized protein, ParE\_toxin super family ParE toxin of type II toxin-antitoxin system, m/z 7645.26 A4CYF4\_SYNPV Translocase / Q3AWH3\_SYNS9 Salt-stress induced hydrophobic peptide, m/z 8680.94 A0A4P7ZTB0\_9SYNE Uncharacterized protein, MazE\_antitoxin super family Antidote-toxin recognition MazE, bacterial antitoxin

**MISSING IN SAMPLE:** 9 peaks (at 1  $\mu$ M), 15 peaks (at 2  $\mu$ M), uncharacterized proteins plus

1  $\mu$ M – m/z 11653.08 A0A1J0P988\_9SYNE Thioredoxin

2  $\mu$ M – m/z 7305.72 Q2JP93\_SYNJB Molybdenum-pterin binding domain protein / A0A1J0PAN2\_9SYNE Photosystem II reaction center protein H, m/z 7650.50 K9SXJ5\_9SYNE Photosystem I reaction center subunit IV / A0A1J0PD21\_9SYNE High light inducible protein, m/z 8314.67 A0A4P7ZV37\_9SYNE Ferrous iron transport protein A / A0A164D6F8\_9SYNE Nif11 domain-containing protein / Q05SV1\_9SYNE 30S ribosomal protein S18, m/z 8676.68 K9RU07\_SYNP3 Ferredoxin / A5GQ62\_SYNR3 Uncharacterized protein, hercynine metabolism small protein / B4WHG5\_SYNS7 Translation initiation factor IF-1, m/z 9013.85 A0A164CD71\_9SYNE Nif11 domain-containing / Q05TX6\_9SYNE Antitoxin, m/z 9197.47 A0A4P7ZUZ9\_9SYNE 50S ribosomal protein L31, m/z 12244.15 B1XPW9\_SYNP2 Arsenical resistance operon repressor, ArsR family / A0A162BKT8\_9SYNE Nucleoid-associated protein MITS9508\_00776

#### 5 and 10 $\mu$ M, 3 weeks

**MISSING IN CONTROL:** 5 peaks (at 5  $\mu$ M), 5 peaks (at 10  $\mu$ M), uncharacterized proteins plus

5  $\mu$ M – m/z 5727.78 Q05WU3\_9SYNE Glutamate-1-semialdehyde aminotransferase, m/z 6991.74 A3YV23\_9SYNE PINc domain-containing protein, m/z 7647.17 Q3AX15\_SYNS9 ThiS, thiamine-biosynthesis,

10  $\mu$ M – m/z 6705.21 Q0IE04\_SYNS3 Photosystem II reaction center protein Z, m/z 6993.79 A5GK98\_SYNPW High light inducible protein / A4CTP9\_SYNPV Possible high light inducible protein, m/z 10252.36 A5GRL7\_SYNR3 Thioredoxin family protein

**MISSING IN SAMPLE:** 17 peaks (at 5  $\mu$ M), 10 peaks (at 10  $\mu$ M), uncharacterized proteins plus

5  $\mu$ M – m/z 7650.50 RL29\_SYNE7 50S ribosomal protein L29 / K9SXJ5\_9SYNE Photosystem I reaction center subunit IV / A0A1J0PD21\_9SYNE High light inducible protein, m/z 8314.67 A0A4P7ZV37\_9SYNE Ferrous iron transport protein / A0A164D6F8\_9SYNE Nif11 domain-containing protein, m/z 9013.85 A0A164CD71\_9SYNE Nif11 domain-containing protein / Q05TX6\_9SYNE Antitoxin, m/z 10876.87 Q05YD5\_9SYNE Possible SAP domain

10  $\mu$ M – m/z 6562.92 B4WTQ9\_SYNS7 Ribulose biphosphate carboxylase, small subunit, m/z 7961.80 A4CUE3\_SYNPV Ribulose-phosphate 3-epimerase, m/z 9197.47 A0A4P7ZUZ9\_9SYNE 50S ribosomal protein L31, m/z 10303.74 B4WHE8\_SYNS7 50S ribosomal protein L23,

5 and 10  $\mu$ M – m/z 10316.80 A0A4V1DHG1\_9SYNE YCII domain-containing protein

#### **MALONIC ACID**

#### 1 and 2 $\mu$ M, 1 week

**MISSING IN CONTROL:** 12 peaks, uncharacterized proteins plus

1  $\mu$ M – m/z 5711.06 B4WGD5\_SYNS7 Uncharacterized protein, transcriptional regulators CsoR (copper-sensitive operon repressor), m/z 6920.21 B4WJ98\_SYNS7 Uncharacterized protein, NdhS NAD(P)H dehydrogenase subunit S, m/z 7687.92 A0A4P7ZS73\_9SYNE Ribbon-helix-helix protein, CopG family, m/z 9012.88 Q05TX6\_9SYNE Antitoxin

**MISSING IN SAMPLE:** 7 peaks, uncharacterized proteins

#### 5 and 10 $\mu$ M, 1 week

**MISSING IN CONTROL:** 6 peaks (at 5  $\mu$ M), 4 peaks (at 10  $\mu$ M), uncharacterized proteins plus

5  $\mu$ M – m/z 7791.75 B4WI75\_SYNS7 Phycobilisome 7.8 kDa linker polypeptide, allophycocyanin-associated, core, m/z 7813.17 Q0I950\_SYNS3 Possible high light inducible protein-related protein, m/z 9014.15 Q05TX6\_9SYNE Antitoxin / A0A164CD71\_9SYNE Nif11 domain-containing protein, m/z 9829.93 B1XMV8\_SYNP2 ThiS family domain protein / A0A4P7ZS91\_9SYNE RHH\_5 domain-containing protein

10  $\mu$ M – m/z 7815.15 A3YVN2\_9SYNE Phycobilisome 7.8 kDa linker polypeptide, allophycocyanin-associated, core, m/z 11988.34 Q0I8E6\_SYNS3 Predicted SH3-like domain containing protein

**MISSING IN SAMPLE:** 4 peaks, uncharacterized proteins including m/z 8161.94 A5GLI5\_SYNPW BoIA-like protein

#### 1 and 2 $\mu$ M, 2 weeks

**MISSING IN CONTROL:** 5 peaks (1  $\mu$ M), 16 peaks (2  $\mu$ M), uncharacterized proteins plus

1  $\mu$ M – m/z 6990.71 A3YV23\_9SYNE PINc domain-containing protein

2  $\mu$ M – m/z 5066.96 B4WR12\_SYNS7 Photosystem II reaction center protein K, m/z 5950.75 K9RVM7\_SYNP3 Uncharacterized protein, valS super family valyl-tRNA synthetase, m/z 6094.58 A4CU00\_SYNPV Nif11 domain-containing protein, m/z 6520.90 K9SWP9\_9SYNE CsbD domain-containing protein, m/z 6663.28 PSBZ\_SYNJB Photosystem II reaction center protein Z, m/z 6807.83 B1XLD7\_SYNP2 Copper-binding metallochaperone, m/z 6864.22 Q0I7D7\_SYNS3 Possible high light inducible protein-related protein / A3Z082\_9SYNE Uncharacterized protein, NAD(P)<sup>+</sup>-dependent aldehyde dehydrogenase superfamily, m/z 7556.01 K9RTG0\_SYNP3 Chlorophyll A-B binding protein

**MISSING IN SAMPLE:** 9 peaks (1  $\mu$ M), 16 peaks (at 2  $\mu$ M) uncharacterized proteins plus

1  $\mu$ M – m/z 7650.77 K9SXJ5\_9SYNE Photosystem I reaction center subunit IV / A0A1J0PD21\_9SYNE High light inducible protein, m/z 8677.70 K9RU07\_SYNP3 Ferredoxin / A5GQ62\_SYNR3 Uncharacterized protein, hercynine metabolism small protein,

2  $\mu$ M – m/z 4859.99 Q3AY61\_SYNS9 Possible high light inducible protein, m/z 6663.28 PSBZ\_SYNJB Photosystem II reaction center protein Z, m/z 7703.70 A0A1J0PDL8\_9SYNE Hydrogenase maturation

protein HypC / A0A4P7ZWN5\_9SYNE CpcD/allophycocyanin linker domain-containing protein, m/z 8726.16 A5GT09\_SYNR3 Predicted periplasmic or secreted lipoprotein, m/z 8764.94 Q3AYN7\_SYNS9 Possible high light inducible protein / Q05TX2\_9SYNE Antitoxin, m/z 9106.97 Q05VW9\_9SYNE NAD(P)H-quinone oxidoreductase subunit O / A4CT67\_SYNPV Cytochrome b559 subunit alpha / PSBE\_SYNS3 Cytochrome b559 subunit alpha, m/z 10724.58 K9RPF6\_SYNP3 Glutaredoxin-like domain (DUF836), m/z 12207.91 A5GNE6\_SYNPW Nitrogen regulatory protein P-II, m/z 12244.67 A0A4P7ZSN5\_9SYNE Hydrogenase maturation factor HypA / B1XPW9\_SYNP2 Arsenical resistance operon repressor, ArsR family

1 and 2  $\mu$ M – m/z 5983.37 A0A4P7ZY82\_9SYNE Cytochrome B6

#### 5 a 10 $\mu$ M, 2 weeks

**MISSING IN CONTROL:** 7 peaks (at 5  $\mu$ M), 10 peaks (at 10  $\mu$ M), uncharacterized proteins plus

5  $\mu$ M – m/z 3812.79 PSBM\_SYNR3 Photosystem II reaction center protein M, m/z 4003.56 P95823\_SYNE7 Photosystem I PsaI protein, m/z 7742.47 Q2JIJ4\_SYNJB CP12 domain protein,

10  $\mu$ M – m/z 5738.36 A3Z2H0\_9SYNE Aspartate aminotransferase, m/z 6538.58 A0A4P7ZVT8\_9SYNE Ribbon-helix-helix protein, CopG family

**MISSING IN SAMPLE:** 7 peaks (at 5  $\mu$ M), 7 peaks (at 10  $\mu$ M) uncharacterized peaks plus

5  $\mu$ M – m/z 5710.14 B4WGD5\_SYNS7 Uncharacterized protein, transcriptional regulators CsoR (copper-sensitive operon repressor), m/z 6920.59 B4WJ98\_SYNS7 Uncharacterized protein, NAD(P)H dehydrogenase subunit S, m/z 7500.21 K9SWT6\_9SYNE Putative transcriptional regulator, m/z 8764.94 Q3AYN7\_SYNS9 Possible high light inducible protein / Q05TX2\_9SYNE Antitoxin

10  $\mu$ M – m/z 6354.00 A4CX12\_SYNPV N-carbamoyl-L-amino acid amidohydrolase, m/z 6468.62 A8HTL9\_SYNP2 NblA, m/z 7686.81 A0A164BQV3\_9SYNE Phycobilisome 7.8 kDa linker polypeptide, allophycocyanin-associated, core

#### 1 a 2 $\mu$ M, 3 weeks

**MISSING IN CONTROL:** 15 peaks (at 1  $\mu$ M), 8 peaks (at 2  $\mu$ M), uncharacterized proteins plus



1  $\mu$ M – m/z 6115.37 K9SXX0\_9SYNE Chlorophyll A-B binding protein, m/z 6364.76 K9RMW4\_SYNP3 Chlorophyll A-B binding protein, m/z 6652.21 A3Z1I4\_9SYNE RNA-binding S4, m/z 6663.78 PSBZ\_SYNJB Photosystem II reaction center protein Z, m/z 6991.38 A3YV23\_9SYNE PINc domain-containing protein,

2  $\mu$ M – m/z 5738.27 A3Z2H0\_9SYNE Aspartate aminotransferase, m/z 6992.10 A3YV23\_9SYNE PINc domain-containing protein, m/z 7967.98 B4WU84\_SYNS7 Nif11 domain-containing protein

**MISSING IN SAMPLE:** 16 peaks (at 1  $\mu$ M), 13 peaks (at 2  $\mu$ M), uncharacterized proteins plus

1  $\mu$ M – m/z 5548.95 B4WNV1\_SYNS7 Uncharacterized protein, light-harvesting-like protein 3, m/z 6500.13 Q3AZH3\_SYNS9 Nif11 domain-containing protein, m/z 7107.07 A0A4P7ZUN2\_9SYNE RHH\_5 domain-containing protein

2  $\mu$ M – m/z 8313.43 A0A164D6F8\_9SYNE Nif11 domain-containing protein, m/z 9136.27 A5GI41\_SYNPW Uncharacterized protein, hercynine metabolism small protein

1 and 2  $\mu$ M – m/z 5147.61 A3YXX8\_9SYNE Uncharacterized protein, Pyruvate phosphate dikinase, m/z 5863.19 A5GPZ9\_SYNR3 HLIP family protein, m/z 5934.89 K9S0C9\_SYNP3 Chlorophyll A-B binding protein, m/z 8329.81 A3YV18\_9SYNE Antitoxin, m/z 10164.11 A0A4P7ZXV3\_9SYNE Cell division protein SepF, m/z 11526.27 A4CYB5\_SYNPV SUI1 domain-containing protein, m/z 12250.37 K9SS56\_9SYNE Carbon dioxide concentrating mechanism/carboxysome shell protein

#### 5 and 10 $\mu$ M, 3 weeks

**MISSING IN CONTROL:** 8 peaks (at 5  $\mu$ M), 11 peaks (at 10  $\mu$ M), uncharacterized proteins plus

5  $\mu$ M – m/z 5199.17 PSBK\_SYNR3 Photosystem II reaction center protein K, m/z 7519.27 A5GRA1\_SYNR3 Uncharacterized conserved membrane protein, m/z 7557.35 K9RTG0\_SYNP3 Chlorophyll A-B binding protein

10  $\mu$ M – m/z 6366.36 K9RMW4\_SYNP3 Chlorophyll A-B binding protein, m/z 6666.77 A0A4P7ZTH0\_9SYNE Photosystem II reaction center protein Z, m/z 7506.62 A5GN33\_SYNPW Hypothetical membrane protein, m/z 7560.45 B4WGY3\_SYNS7 DDE\_5 domain-containing protein / PSBH\_SYNJB Photosystem II reaction center protein H, m/z 8706.92 B4WLD0\_SYNS7 NAD(P)H-quinone oxidoreductase subunit L,

**MISSING IN SAMPLE:** 12 peaks (at 5  $\mu$ M), 7 peaks (at 10  $\mu$ M), uncharacterized proteins plus

5  $\mu$ M – m/z 5147.61 A3YXX8\_9SYNE Uncharacterized protein, Pyruvate phosphate dikinase, m/z 5371.61 Q05WR3\_9SYNE Possible high light inducible protein, m/z 5548.95 B4WNV1\_SYNS7 Uncharacterized protein, light-harvesting-like protein 3, m/z 5934.89 K9S0C9\_SYNP3 Chlorophyll A-B binding protein, m/z 6194.72 A0A4V1DHJ0\_9SYNE 50S ribosomal protein L32, m/z 6772.71 A5GVH5\_SYNR3 High light inducible protein, m/z 8313.43 A0A164BYD7\_9SYNE Nif11 domain-containing protein, m/z 8329.81 A3YV18\_9SYNE Antitoxin, m/z 9175.03 PSBE\_SYNR3 Cytochrome b559 subunit alpha

10  $\mu$ M – m/z 11526.27 A4CYB5\_SYNPV SUI1 domain-containing protein

5 and 10  $\mu$ M, m/z 5863.19 A5GPZ9\_SYNR3 HLIP family protein, m/z 6500.13 Q3AZH3\_SYNS9 Nif11 domain-containing protein, m/z 10164.11 A0A4P7ZXV3\_9SYNE Cell division protein SepF

## CHLORAMPHENICOL

### 1 $\mu$ M, 1 week

**MISSING IN CONTROL:** no difference

**MISSING IN SAMPLE:** just a few peaks, uncharacterized proteins

### 2 $\mu$ M, 1 week

**MISSING IN CONTROL:** no difference

**MISSING IN SAMPLE:** 1 peak, uncharacterized protein

### 5 $\mu$ M, 1 week

**MISSING IN CONTROL:** 2 peaks, including m/z 12629.31 K9SRF7\_9SYNE Anti-sigma factor antagonist

**MISSING IN SAMPLE:** 13 peaks, uncharacterized proteins plus m/z 6520.99 K9SWP9\_9SYNE CsbD domain-containing protein; m/z 6864.31 Q0I7D7\_SYNS3 Possible high light inducible protein-related protein; m/z 6864.31 A3Z082\_9SYNE Uncharacterized protein - NAD(P)<sup>+</sup>-dependent aldehyde dehydrogenase superfamily; m/z 7304.64 Q2JP93\_SYNJB Molybdenum-pterin binding domain protein; m/z Q2JP93\_SYNJB Molybdenum-pterin binding domain protein; m/z 7831.99 A0A0G8ATC7\_9SYNE Stress-induced morphogen; m/z 8456.47 A3Z2M6\_9SYNE YCII-related domain protein (Fragment); m/z 8456.47 Q3AYE7\_SYNS9 Nif11 domain-containing protein

10  $\mu$ M, 1 week

**MISSING IN CONTROL:** 3 peaks, uncharacterized proteins

**MISSING IN SAMPLE:** m/z 8831.72 A0A1J0PC10\_9SYNE SpoVT-AbrB domain-containing protein

1  $\mu$ M, 2 weeks

**MISSING IN CONTROL:** 2 peaks, uncharacterized proteins including m/z 11811.76 Q3AYG2\_SYNS9 Cytochrome c6 (Soluble cytochrome f) (Cytochrome c553)

**MISSING IN SAMPLE:** 5 peaks, uncharacterized proteins plus m/z 6863.31 A3Z082\_9SYNE Uncharacterized protein - ALDH-SF super family; m/z 6863.31 Q0I7D7\_SYNS3 Possible high light inducible protein-related protein; A0A4P7ZW69\_9SYNE Ribbon-helix-helix protein, CopG family; m/z 8207.29 K9SQD3\_9SYNE 30S ribosomal protein S18

2  $\mu$ M, 2 weeks

**MISSING IN CONTROL:** 2 peaks, uncharacterized proteins including m/z 11812.34 A0A1J0PDR2\_9SYNE Nucleoid-associated protein BM449 or A5GNU2\_SYNPW RHH\_5 domain-containing protein

**MISSING IN SAMPLE:** 13 peaks, uncharacterized proteins plus m/z 3764.80 K9SW16\_9SYNE Cytochrome B6-F complex subunit 5; m/z 4859.77 Q3AY61\_SYNS9 Possible high light inducible protein; m/z 4976.41 B4WKQ1\_SYNS7 Protein PsbN; m/z 5710.98 B4WGD5\_SYNS7 Uncharacterized protein - CsoR-like\_DUF156 super family, Transcriptional regulators CsoR; m/z 6920.06 B4WJ98\_SYNS7 Uncharacterized protein - NdhS NAD(P)H dehydrogenase subunit S; m/z 7176.96 A5GNP5\_SYNPW High light inducible protein; m/z 7304.60 Q2JP93\_SYNJB Molybdenum-pterin binding domain protein; m/z 7829.83 A5GII8\_SYNPW Uncharacterized membrane protein; m/z 8207.29 K9SQD3\_9SYNE 30S ribosomal protein S18; m/z 8315.07 A0A4P7ZV37\_9SYNE Ferrous iron transport protein; m/z 8710.03 A0A163YG82\_9SYNE CDP-6-deoxy-delta-3,4-glucose reductase; m/z 10765.39 A0A164CRS2\_9SYNE Uncharacterized protein - DnaJ super family DnaJ-class molecular chaperone with C-terminal Zn finger domain

5  $\mu$ M, 2 weeks

**MISSING IN CONTROL:** 2 peaks, uncharacterized proteins

**MISSING IN SAMPLE:** 16 peaks, uncharacterized proteins plus m/z 4976.41 B4WKQ1\_SYNS7 Protein PsbN; m/z 6095.00 A5GLD4\_SYNPW Uncharacterized protein - Nucleotide-Binding Domain of the sugar kinase/HSP70/actin superfamily; m/z 6095.00 A4CU00\_SYNPV Nif11 domain-containing protein; m/z 7176.96 A5GNP5\_SYNPW High light inducible protein; m/z 7304.60 Q2JP93\_SYNJB Molybdenum-pterin binding domain protein; m/z 9830.71 B1XMV8\_SYNP2 ThiS family domain protein m/z 9830.71 A0A4P7ZS91\_9SYNE RHH\_5 domain-containing protein

10  $\mu$ M, 2 weeks

**MISSING IN CONTROL:** no difference

**MISSING IN SAMPLE:** outside exceptions, a majority of peaks disappeared

1  $\mu$ M, 3 weeks

**MISSING IN CONTROL:** 8 peaks, uncharacterized proteins plus m/z 5710.86 B4WGD5\_SYNS7 Uncharacterized protein - CsoR-like\_DUF156 super family, Transcriptional regulators CsoR; m/z 8207.71 K9SQD3\_9SYNE 30S ribosomal protein S18

**MISSING IN SAMPLE:** 3 peaks including m/z 5239.89 A0A4V1DHX4\_9SYNE Photosystem II reaction center protein K

2  $\mu$ M, 3 weeks

**MISSING IN CONTROL:** 9 peaks, m/z 5464.06 Q2JLF4\_SYNJB Carbohydrate uptake ABC transporter-2 (CUT2) family, ATP-binding protein, truncation; m/z 5711.25 B4WGD5\_SYNS7 CsoR-like\_DUF156 super family cl00846 Transcriptional regulators; 7518.94 A4CXY5\_SYNPV Salt-stress induced hydrophobic peptide; m/z 9755.82 A5GR99\_SYNR3 Uncharacterized protein - chp\_P\_marinus\_1 super family; m/z 9799.89 A3YUF7\_9SYNE Glutaredoxin

**MISSING IN SAMPLE:** 4 peaks including m/z 4620.39 B4WU16\_SYNS7 Y1\_Tnp domain-containing protein

5  $\mu$ M, 3 weeks

**MISSING IN CONTROL:** 13 peaks, uncharacterized proteins plus m/z 5453.98 Q2JLF4\_SYNJB Carbohydrate uptake ABC transporter-2 (CUT2) family, ATP-binding protein, truncation; m/z 8205.88 Q3AUQ7\_SYNS9 Sec-independent protein translocase protein TatA; m/z 8710.47 A0A163YG82\_9SYNE CDP-6-deoxy-delta-3,4-glucoseen reductase

**MISSING IN SAMPLE:** 6 peaks, uncharacterized proteins plus m/z 4620.39 B4WU16\_SYNS7 Y1\_Tnp domain-containing protein plus a few other uncharacterized proteins

10  $\mu$ M, 3 weeks

**MISSING IN CONTROL:** no differential peaks

**MISSING IN SAMPLE:** numerous peaks disappeared

**STREPTOMYCIN**

1 and 2  $\mu$ M, 1 week

**MISSING IN CONTROL:** no difference

**MISSING IN SAMPLE:** just a few peaks, uncharacterized proteins

5  $\mu$ M, 1 week

**MISSING IN CONTROL:** 1 peak, m/z 3872.91 A3ZOW3\_9SYNE Uncharacterized protein - PIN\_SF super family

**MISSING IN SAMPLE:** 9 peaks, uncharacterized proteins plus m/z 8109.22 A5GU94\_SYNR3 BolA-like protein; m/z 8459.60 RPOZ\_SYNS3 DNA-directed RNA polymerase subunit omega; m/z 9830.43 B1XMV8\_SYNP2 ThiS family domain protein – sulfur carrier; m/z 12246.22 K9RQQ2\_SYNP3 Putative transcriptional regulator

#### 10 $\mu$ M, 1 week

**MISSING IN CONTROL:** 4 peaks, including m/z 3889.17 A3YUT5\_9SYNE Photosystem II reaction center protein M; m/z 12578.68 A0A4P7ZVA0\_9SYNE AIR synthase; m/z 12578.68 Q2JL23\_SYNJB Iron-sulfur cluster assembly accessory protein

**MISSING IN SAMPLE:** 20 peaks, uncharacterized proteins plus m/z 4859.41 Q3AY61\_SYNS9 Possible high light inducible protein; m/z 6407.77 K9SVD1\_9SYNE Sec-independent protein translocase protein TatA; m/z 6993.12 A5GK98\_SYNPW High light inducible protein; m/z 6993.12 A4CTP9\_SYNPV Possible high light inducible protein; m/z 7177.29 A5GNP5\_SYNPW High light inducible protein; m/z 8459.60 RPOZ\_SYNS3 DNA-directed RNA polymerase subunit omega; m/z 9013.46 Q05TX6\_9SYNE Antitoxin; m/z 9830.43 B1XMV8\_SYNP2 ThiS family domain protein – sulfur carrier; m/z 9830.43 A0A4P7ZS91\_9SYNE RHH\_5 domain-containing protein – transcription regulator; m/z 12246.22 K9RQQ2\_SYNP3 Putative transcriptional regulator

#### 1 $\mu$ M, 2 weeks

**MISSING IN CONTROL:** 14 peaks, uncharacterized proteins plus m/z 3765.63 K9SW16\_9SYNE Cytochrome B6-F complex subunit 5; m/z 3874.20 K9RVZ0\_SYNP3 Photosystem II reaction center protein M; m/z 3874.20 A3Z0W3\_9SYNE Uncharacterized protein - PIN\_SF super family; m/z 5170.29 Q05UQ6\_9SYNE Uncharacterized protein - Medium chain reductase/dehydrogenase (MDR)/zinc-dependent alcohol dehydrogenase-like family; m/z 7532.87 A0A4P7ZV92\_9SYNE RHH\_5 domain-containing protein; m/z 8711.49 A5GPD7\_SYNPW Protein translocase subunit SecE; m/z 10373.54 A3YYK3\_9SYNE RNA-binding protein RbpD; m/z 12024.07 Q3B072\_SYNS9 NAD(P)H-quinone oxidoreductase subunit 4L; m/z 12578.41 A0A4P7ZVA0\_9SYNE AIR synthase

**MISSING IN SAMPLE:** 28 peaks, uncharacterized proteins plus m/z 4505.66 PSBL\_SYNS3 Photosystem II reaction center protein L; m/z 5382.88 A4CRN4\_SYNPV 50S ribosomal protein L34; m/z 5842.06 B4WII5\_SYNS7 Photosystem I reaction center subunit VIII; m/z 5983.44 Q05TX4\_9SYNE Uncharacterized protein - Glycerol-3-phosphate acyltransferase; m/z 6166.07 A4CU28\_SYNPV Putative hydroxylase; m/z 6345.55 Q0I967\_SYNS3 Uncharacterized protein - NADB\_Rossmann super family; m/z 7627.56 RL35\_SYNJB 50S ribosomal protein L35; m/z 7662.95 K9RVM2\_SYNP3 Uncharacterized protein - NAD(P)H dehydrogenase subunit S; m/z 7963.08 NDHO\_SYNJB NAD(P)H-quinone oxidoreductase subunit O; m/z 8230.69 Q31RI2\_SYNE7 Uncharacterized protein - Unstab\_antitox; m/z 9012.75 Q05TX6\_9SYNE

Antitoxin; m/z 11684.22 K9SYX4\_9SYNE UPF0060 membrane protein; m/z 14172.83 CRCB2\_SYNS9 Putative fluoride ion transporter CrcB 2

2, 5 and 10  $\mu$ M, 2 weeks

**MISSING IN CONTROL:** up to 20 peaks, uncharacterized proteins plus m/z 3765.63 K9SW16\_9SYNE Cytochrome B6-F complex subunit 5; m/z 3874.26 K9RVZ0\_SYNP3 Photosystem II reaction center protein M; m/z 3909.27 PSBM\_SYNE7 Photosystem II reaction center protein M; m/z 4082.06 K9SR44\_9SYNE Photosystem II reaction center protein T; m/z 5402.01 K9SQ74\_9SYNE Uncharacterized protein - Flavin\_utilizing\_monooxygenases super family; m/z 7519.17 A4CXY5\_SYNPV Salt-stress induced hydrophobic peptide; m/z 7532.70 A0A4P7ZV92\_9SYNE RHH\_5 domain-containing protein; m/z 8711.30 A0A163YG82\_9SYNE CDP-6-deoxy-delta-3,4-glucose reductase; m/z 8711.30 A5GPD7\_SYNPW Protein translocase subunit SecE; m/z 8711.30 K9SS39\_9SYNE Photosystem I reaction center subunit Psak; m/z 10414.77 A0A4P7ZVNO\_9SYNE Galactose oxidase; m/z 12576.59 K9SR95\_9SYNE Photosystem II reaction center Psb28 protein

**MISSING IN SAMPLE:** up to 36 peaks, uncharacterized proteins plus m/z 6070.03 B4WRS1\_SYNS7 Uncharacterized protein - GST\_C\_family super family; m/z 6166.07 A4CU28\_SYNPV Putative hydroxylase; m/z 6278.80 A4CWX9\_SYNPV Cyanate hydratase; m/z 6345.55 Q0I967\_SYNS3 Uncharacterized protein - NADB\_Rossmann super family; m/z 6408.23 K9SVD1\_9SYNE Sec-independent protein translocase protein TatA; m/z 6663.46 A5GNQ1\_SYNPW Uncharacterized conserved membrane protein; m/z 7305.54 A4CQV2\_SYNPV Uncharacterized protein - TNFRSF super family; m/z 7629.66 RL33\_SYNS9 50S ribosomal protein L33; m/z 7662.95 K9RVM2\_SYNP3 Uncharacterized protein NAD(P)H dehydrogenase subunit S; m/z 7948.06 B4WFM6\_SYNS7 Uncharacterized protein - VapB\_antitoxin; m/z 7948.06 A0A4P7ZRM0\_9SYNE Acetyltransferase; m/z 7948.06 B1XKY2\_SYNP2 Ferredoxin; m/z 7963.08 NDHO\_SYNJB NAD(P)H-quinone oxidoreductase subunit O; m/z 8230.69 Q31RI2\_SYNE7 Uncharacterized protein - Unstab\_antitox; m/z 9012.75 Q05TX6\_9SYNE Antitoxin; m/z 9829.88 A0A4P7ZS91\_9SYNE RHH\_5 domain-containing protein - transcription regulator; m/z 9829.88 B1XMV8\_SYNP2 ThiS family domain protein; m/z 11513.81 Q0ID52\_SYNS3 Uncharacterized yci family conserved protein; m/z 11684.22 K9SYX4\_9SYNE UPF0060 membrane protein; m/z 14172.83 CRCB2\_SYNS9 Putative fluoride ion transporter CrcB; m/z 14172.83 A5GUG5\_SYNR3 Ferric uptake regulator family protein

1, 2, 5 and 10  $\mu$ M, 3 weeks

**MISSING IN CONTROL:** up to 20 peaks, uncharacterized proteins plus m/z 3872.70 A3Z0W3\_9SYNE Uncharacterized protein - PIN\_SF super family; m/z 4764.66 PSBF\_SYNP2 Cytochrome b559 subunit beta; m/z 5149.93 A3YYY5\_9SYNE Bacterial metallothionein; m/z 5402.09 5  $\mu$ M K9SQ74\_9SYNE Uncharacterized protein - Flavin\_utilizing\_monooxygenases super family; m/z 5698.26 5  $\mu$ M Q0I7M0\_SYNS3 Possible high light inducible protein; m/z 5752.98 5  $\mu$ M A0A4P7ZT99\_9SYNE High light inducible protein; m/z 9255.16 5  $\mu$ M RPOZ\_SYNS9 DNA-directed RNA polymerase subunit omega; m/z 12576.08 K9SR95\_9SYNE Photosystem II reaction center Psb28 protein

**MISSING IN SAMPLE:** up to 24 peaks were missing

## **MICROGRAVITY**

2 and 3 weeks

**MISSING IN CONTROL:** 35 peaks, uncharacterized proteins plus m/z 3873.25 A3Z0W3\_9SYNE Uncharacterized protein - PIN\_SF super family; m/z 4043.25 PSBJ\_SYNJB Photosystem II reaction center protein J; m/z 4080.94 K9SR44\_9SYNE Photosystem II reaction center protein T; m/z 4619.92 B4WU16\_SYNS7 Y1\_Tnp domain-containing protein; m/z 4989.10 Q05RZ3\_9SYNE Possible high light inducible protein; m/z 5120.49 A3Z318\_9SYNE Glutaredoxin-related protein (Fragment); m/z 5120.49 A0A1J0PBS6\_9SYNE High light inducible protein; m/z 5372.84 RL34\_SYNS3 50S ribosomal protein L34; m/z 9146.22 Q3AVY9\_SYNS9 Glutaredoxin; m/z 12023.02 A0A162CTQ0\_9SYNE MazG nucleotide pyrophosphohydrolase domain protein

**MISSING IN SAMPLE:** 44 peaks, uncharacterized proteins plus m/z 3574.29 PSAM\_SYNPW Photosystem I reaction center subunit XII; m/z 3626.34 PETN\_SYNS9 Cytochrome b6-f complex subunit 8; m/z 3911.25 A0A1J0PC67\_9SYNE Photosystem II reaction center protein M; m/z 4333.13 A3YY19\_9SYNE Photosystem I reaction center subunit IX; m/z 4431.18 PSAJ\_SYNR3 Photosystem I reaction center subunit IX; m/z 4962.98 A3YVC3\_9SYNE Possible high light inducible polypeptide HliC; m/z B4WKQ1\_SYNS7 Protein PsbN; 4977.06 m/z 4994.44 A3YTM9\_9SYNE Cytochrome b559 subunit beta; m/z 5099.57 A3YW30\_9SYNE Possible high light inducible protein; m/z 5539.90 A3YXF2\_9SYNE Photosystem II reaction center protein K; m/z 5757.04 Q05WFO\_9SYNE High light inducible protein hli2; m/z 6297.80 B1XMX1\_SYNP2 Uncharacterized protein - NdhS, NAD(P)H dehydrogenase subunit S; m/z 6346.55 Q0I967\_SYNS3 Uncharacterized protein - NADB\_Rossmann super family; m/z 6427.62 Q05UFO\_9SYNE



Uncharacterized protein - NdhS, NAD(P)H dehydrogenase subunit S; m/z 6469.68 Q0I6B3\_SYNS3 Valyl-tRNA synthetase; m/z 7087.99 A3Z0W8\_9SYNE Uncharacterized protein - VapB\_antitoxin; m/z 7948.26 B1XKY2\_SYNP2 Ferredoxin; m/z 7948.26 A0A4P7ZRM0\_9SYNE Acetyltransferase; m/z 7948.26 B4WFM6\_SYNS7 Uncharacterized protein - VapB\_antitoxin; m/z 8330.00 A3YV18\_9SYNE Antitoxin; m/z 8502.86 B4WVY0\_SYNS7 HTH cro/C1-type domain-containing protein - HTH\_XRE, Helix-turn-helix XRE-family like proteins; m/z 8502.86 Q05UH5\_9SYNE Uncharacterized protein - small\_w\_EgtBD, hercynine metabolism small protein; m/z 8578.39 Q3AUX7\_SYNS9 Transcriptional regulator, LuxR family; m/z 9795.57 RL31\_SYNS3 50S ribosomal protein L31; m/z 10781.42 A4CVU0\_SYNPV Putative nicotinamide nucleotide transhydrogenase, subunit alpha 2 (A2); m/z 10781.42 A5GM89\_SYNPW NAD/NADP transhydrogenase subunit alpha part 2
